## 1 Lifespan analysis of repeat expression reveals age-dependent upregulation of HERV-K in 2 the neurotypical human brain

3 Taylor A. Evans <sup>1,3</sup>, Arthur S. Feltrin <sup>1</sup>, Kynon J. Benjamin <sup>1,3,4</sup>, Tarun Katipalli <sup>1</sup>, Thomas Hyde <sup>1-3</sup>, Joel E.  
4 Kleinman <sup>1,4</sup>, Daniel R. Weinberger <sup>1-5</sup>, Apua C. Paquola <sup>1-3</sup>, Jennifer A. Erwin <sup>\* 1-3</sup>

- 5 1. Lieber Institute for Brain Development, Baltimore, MD, United States of America
- 6 2. Johns Hopkins University School of Medicine, Department of Neuroscience, Baltimore, MD, United  
7 States of America
- 8 3. Johns Hopkins University School of Medicine, Department of Neurology, Baltimore, MD, United  
9 States of America
- 10 4. Johns Hopkins University School of Medicine, Department of Psychiatry & Behavioral Sciences,  
11 Baltimore, MD, United States of America
- 12 5. Johns Hopkins University School of Medicine, McKusick-Nathans Department of Genetic Medicine,  
13 Baltimore, MD, United States of America

14 \*Corresponding Author

### 15 Abstract

16 DNA repetitive sequences (or repeats) comprise over 50% of the human genome and have a  
17 crucial regulatory role, specifically regulating transcription machinery. The human brain is the  
18 tissue with the highest detectable repeat expression and dysregulations on the repeat activity are  
19 related to several neurological and neurodegenerative disorders, as repeat-derived products can  
20 stimulate a pro-inflammatory response. Even so, it is unclear how repeat expression acts on the  
21 aging neurotypical brain. Here, we leverage a large postmortem transcriptome cohort spanning  
22 the human lifespan to assess global repeat expression in the neurotypical brain. We identified  
23 21,696 differentially expressed repeats (DERs) that varied across seven age bins (Prenatal; 0-  
24 15; 16-29; 30-39; 40-49; 50-59; 60+) across the caudate nucleus (n=271), dorsolateral prefrontal  
25 cortex (n=304), and hippocampus (n=310). Interestingly, we found that long interspersed nuclear  
26 elements and long terminal repeats (LTRs) DERs were the most abundant repeat families when  
27 comparing infants to early adolescence (0-15) with older adults (60+). Of these differentially  
28 regulated LTRs, we identified 17 shared across all brain regions, including increased expression  
29 of HERV-K-int in older adult brains (60+). Co-expression analysis from each of the three brain  
30 regions also showed repeats from the HERV subfamily were intramodular hubs in its  
31 subnetworks. While we do not observe a strong global relationship between repeat expression  
32 and age, we identified HERV-K as a repeat signature associated with the aging neurotypical brain.  
33 Our study is the first global assessment of repeat expression in the neurotypical brain.

34

## 35 **Keywords**

36 HERV-K, repeat biology, retroelements, aging, neurodegeneration, RNA-seq, Co-Expression

37

## 38 **Introduction**

39 Present in multiple copies, repetitive sequences, herein referred to as repeats, are a broad category  
40 of DNA sequences known to play crucial homeostatic roles within organisms including plants,  
41 insects, and humans through evolution (Ding et al., 2017; Petersen et al., 2019). In humans, repeats  
42 comprise over 50% of the human genome and have evolved to contribute to cell biology through  
43 more than insertional mutagenesis. However, following their discovery and causative link to  
44 hemophilia A, repeats have primarily been associated with their mutagenic capacity and disease  
45 (Gorbunova et al., 2021). A subcategory of repeats, retroelements, can move through an RNA  
46 intermediate, yet most of these elements are immobilized. Even when immobilized, repeats can  
47 contribute to the transcriptome of a cell, tissue, and organ (Schrader & Schmitz, 2018; Yamamoto  
48 et al., 2022).

49

50 Expression of repeat sequences poses a threat to genomic stability but is particularly relevant in  
51 the healthy human brain as it is the tissue with the highest detectable repeat expression (Bogu et  
52 al., 2019). Given the functional consequences of repeat expression in both healthy and diseased  
53 tissue, repeat sequences are regulated at the genomic, transcriptional, and post-transcriptional  
54 levels. Among the many mechanisms that human cells employ to silence repeat expression,  
55 maintenance of epigenetic marks on DNA and histones is crucial to healthy brain development.

56

57 Dysregulation of repeat-derived RNAs and proteins has been reported in neurological diseases  
58 including neurodegenerative diseases such as Alzheimer's disease, Parkinson's disease, and  
59 multiple sclerosis (MS) (Evans & Erwin, 2021). A series of studies investigating the role of repeat-

60 derived products in MS found that human endogenous retroviruses, also known as HERVs, are  
61 increased in several patient samples and are associated with disease status (Macías-Redondo et  
62 al., 2021).

63 Our current understanding of repeat expression and age relies on limited data from non-human  
64 model systems, peripheral tissues, and postmortem tissue from limited developmental timepoints  
65 (Bogu et al., 2019; de Cecco et al., 2013; He et al., 2021; Lee et al., 2012; Li et al., 2013; Schmitt  
66 et al., 2013). As a result, the field has struggled to contextualize changes to repeat expression in  
67 neurological disease states without a comprehensive understanding of repeat expression across  
68 age.

69  
70 This same hypothesis has been applied to aging, termed sterile inflammation, and suggests repeat-  
71 derived RNAs contribute to a positive feedback loop of functional and biochemical decline with age  
72 (Dumetier et al., 2022; López-Otín et al., 2013). Dysregulation of epigenetic machinery is a hallmark  
73 of aging, and one theory suggests aging induces a global relaxation of heterochromatin. Thus,  
74 remodeling of the epigenetic landscape confers transcriptomic changes and a global de-repression  
75 of repeats (LaRocca et al., 2020). The link between repeat expression and aging is evidenced by  
76 several observations. Patients with progeroid syndromes, genetic diseases that mimic physiological  
77 aging, exhibit increased LINE-1 repeat expression (Della Valle et al., 2022). Furthermore,  
78 prematurely aged mice, exhibiting hallmarks of aged chromatin, showed increased LINE-1 (long  
79 interspersed nuclear elements) repeat expression (Simon et al., 2019). Upon treatment with reverse  
80 transcriptase inhibitors, compounds that target LINE-1 RNA products from being reverse  
81 transcribed, mice showed increased health and longevity. Together, these findings suggest repeat  
82 derepression contributes to aging phenotypes.

83  
84 These observations converge in Alzheimer's Disease, a spontaneous/idiopathic neurodegenerative  
85 disease where disease risk is associated with age (Guerreiro & Bras, 2015). Tau neurofibrillary

86 tangles, a neuropathological hallmark of AD, has been implicated as causative in AD though the  
87 mechanism is unclear. Studies report that tau promotes neurodegeneration through chromatin  
88 relaxation and thus, activates repeat expression in human postmortem brains (Frost et al., 2014;  
89 Guo et al., 2018). It is still unclear how repeat expression contributes to disease etiology, but it is  
90 possible repeat expression is a feature of aging that is exacerbated by disease.

91  
92 Our study leverages a large postmortem transcriptome cohort spanning the human lifespan to  
93 assess repeat expression in three neurotypical brain regions – caudate nucleus (n=271),  
94 dorsolateral prefrontal cortex (DLPFC; n=304), and hippocampus (n=310). We pay particular  
95 attention to the expression of repeats associated with human health and disease, specifically LINEs,  
96 long terminal repeats (LTRs), short interspersed nuclear elements (SINEs), and satellite repeats.  
97 By employing co-expression and differential expression analyses across the three brain regions as  
98 a function of age, we glean valuable insights into the region-specific dynamics of repeat expression  
99 during aging and its links to age-related neurological disorders.

100

101

## 102 **Results**

103

### 104 **Selection of repeat quantification method**

105 Here, we aimed to quantify repeat-derived RNAs from 885 postmortem brain samples (n=291  
106 female, n=594 male; **Supplemental Figure 1A**). To build this resource of repeat-derived RNA  
107 expression across three brain regions (caudate nucleus [n=271], DLPFC [n=304], and  
108 hippocampus [n=310]) (Benjamin et al., 2022; Jaffe et al., 2018; Schubert et al., 2015), we first  
109 tested two distinct methods designed to quantify repeat expression, TEcount (Jin et al., 2015)  
110 and featureCounts (Liao et al., 2014). Both featureCounts and TEcount quantify genomic features  
111 (genes and repeats) and share 2,336,733 unique repeat sequences (**Supplemental Figure 1B**).

112 However, when considering all quantifiable repeats, we observe differences between the  
113 methods' potential benefits as featureCounts can quantify genomic features on the negative  
114 strand and when considering all repeats, we observed substantial differences between the two  
115 methods with about 50% of the repeats unique to each method (**Supplemental Figure 1C**).  
116 TEcount method is uniquely designed to quantify transposable elements, as reflected in the  
117 composition of its annotation file (**Supplemental Figure 1D**). For featureCounts, we generated a  
118 custom annotation file similar to TEcounts, using RepeatMasker but allowing for strand-specific  
119 information and additional satellite repeat annotations (**Supplemental Figure 1E**).

120  
121 Despite this, the methods show high Pearson's correlation, thus perform similarly, when  
122 quantifying evolutionarily young repeats such as L1HS ( $R^2=0.98$ ) and SVA F ( $R^2=0.89$ )  
123 (**Supplemental Figure 1F-G**). Due to its ability to quantify simple and satellite repeats, including  
124 those previously associated with Huntington's disease, amyotrophic lateral sclerosis, and  
125 frontotemporal dementia (Kmetzsch et al., 2020), featureCounts was selected for repeat  
126 quantification and downstream analyses. The authors welcome questions to help generate a  
127 custom annotation file.

128  
129 **Quantification of repeat expression across brain age**

130 To generate repeat counts with featureCounts from 885 brain samples spanning prenatal - 90  
131 years across the caudate nucleus (n=271), DLPFC (n=304), and hippocampus (n=310) (**Figure**  
132 **1A, 1B**), we used a custom annotation file (GTF) generated from University of California Santa  
133 Cruz's RepeatMasker containing stranded information about genes and repeats. Using this  
134 custom GTF, featureCounts randomly assigns multi-mapping reads from aligned .bam files to a  
135 corresponding genomic feature (**Figure 1C**). Subsequently, quality control was performed, and  
136 an expression matrix was generated containing 268 caudate samples, 287 DLPFC, and 306  
137 hippocampus samples (**Supplemental Table S1**).

138

139 This expression matrix contained quantification of repeat sequences across all samples and was  
140 the basis for downstream analyses including differential expression and Weighted Gene  
141 Correlation Network Analysis (WGCNA; **Figure 1D**) (Langfelder & Horvath, 2008). Given the high  
142 sequence similarity and multiple copies of repeats, along with the ambiguity of short reads, we  
143 acknowledge the likelihood for repetitive sequences to map to multiple locations in the genome.  
144 Therefore, downstream analyses investigate repeat expression at a superfamily or class level  
145 rather than the behavior of individual repeats at specific genomic loci/coordinates.

146

147 **Figure 1. Characterizing repeat expression over lifespan of the neurotypical postmortem**  
148 **brain.** A) Neurotypical postmortem brain samples (n=855) included in study span from prenatal  
149 to 91 years of age. B) Samples originate from caudate nucleus (n=271), DLPFC (n=304), and  
150 hippocampus (n=310) and were binned according to age of death. C) Overview of repeat and  
151 gene expression quantification utilizing featureCounts algorithm and custom annotated gene  
152 transfer format (GTF) file with hg38 genome. D) Overview of downstream characterization for co-  
153 expression analysis (weighted gene correlation network analysis [WGCNA]) and differential  
154 expression analysis.

155

### 156 **Hippocampal repeat expression correlates with brain age**

157

158 Age-related epigenetic modifications may lead to widespread activation of repetitive elements,  
159 with a positive correlation observed between total repeat expression and chronological age. To  
160 test this hypothesis, we correlated total repeat expression with ages (0-91 years) across brain  
161 regions. Here, we found a slight positive correlation between total repeat expression and age  
162 (Figure 2A;  $R=0.14$ ,  $p=2.4e-5$ ). Interestingly, we see a minor correlation between total repeat  
163 expression and age of death (**Figure 2A**;  $R=0.14$ ,  $p=2.4e-5$ ). When we stratify this correlation by

164 brain region, we observe the hippocampus has the highest correlation between total repeat  
165 expression and brain age (**Figure 2B**;  $R=0.17$ ,  $p=0.0024$ ; Spearman Rank Correlation). The  
166 caudate nucleus and DLPFC had negligible correlation. Taken together, this data suggests a  
167 relationship between age and repeat expression that is unique to neurotypical hippocampus.

168

169 **Figure 2. Repeats cluster together by co-expression and genes associated with RNA**  
170 **biology.** A) Total repeat expression from uniquely mapped reads mildly correlates with age of  
171 death (Spearman two-sided;  $\rho=0.14$ ,  $p=2.4e-5$ ) B) When stratified by brain region, correlation  
172 of total repeat expression with age of is driven by the hippocampus (Spearman two-sided;  
173  $\rho=0.17$ ,  $p=0.0024$ ) C) Schematic representing how WGCNA utilizes expression matrix to place  
174 repeats and genes into neighborhoods and generate co-expression networks. D) WGCNA module  
175 composition across caudate nucleus, DLPFC, and hippocampus as a proportion of genes and  
176 repeats. E) Heatmap of correlation between repeat-dense modules and clinical traits of caudate  
177 nucleus, DLPFC, and hippocampus samples. Repeat-dense modules negatively correlate with  
178 age of death across repeat-dense modules. Yet, repeat-dense modules positively correlate with  
179 neuropathological scores in the caudate nucleus. F) Gene ontology enrichment for DLPFC Brown  
180 module. G) Gene ontology enrichment for caudate nucleus, Light Cyan module.

181

## 182 **Repeats co-expression with RNA binding genes**

183 To understand the biological pathways associated with repeats and age across the neurotypical  
184 brain, we performed weighted gene co-expression network analysis (WGCNA) on both gene and  
185 repeat expression profiles derived from bulk RNA-seq data for each of the three brain regions.  
186 WGCNA utilizes the gene expression matrix generated from uniquely mapped reads to cluster  
187 expressed features (repeats or genes) into co-expression modules, referred to as modules in the  
188 remainder of the text, based on the Pearson correlation coefficient between a pair of features.  
189 Previously, this method has been applied to gene expression, miRNA expression and DNA

190 methylation (Euclides et al., 2022; Langfelder & Horvath, 2008; Pascut et al., 2020), but here, we  
191 apply WGCNA to a residualized expression matrix containing both repeat and gene expression.  
192 To reduce artifacts introduced by evolutionarily young repeats, only uniquely mapped reads were  
193 considered (**Methods**) when generating brain region networks using power  $\beta = 14$  threshold  
194 (**Supplemental Table 2**). Given the potentially region-specific relationship between repeat  
195 expression and age, we applied WGCNA to organize 2336 unique repeats and 21986 unique  
196 genes into modules by brain region to generate three regional co-expression networks (**Figure**  
197 **2C**). The caudate nucleus, DLPFC, and hippocampus produced 16, 14, 13 modules, respectively.  
198 Module size varies and the total number of features (repeats and genes) within a module is  
199 indicated in parentheses and is detailed in (**Supplemental Table 3**).

200  
201 To investigate the heterogeneity of each module, we visualized the proportion of repeats and  
202 genes. Modules composed of >50% of total features were classified as repeat-dense. The number  
203 of repeat-dense modules varied by brain region (**Figure 2D; Supplemental Table 3**).  
204 Interestingly, while it had the highest correlation between total repeat expression and age, the  
205 hippocampus had the fewest number (2) of repeat-dense modules compared to caudate nucleus  
206 (5) or DLPFC (3).

207  
208 To evaluate if repeat-dense clusters correlate with age and others clinical features related with  
209 senescence, we calculated the Pearson correlation coefficient between each WGCNA's module  
210 eigengene (kME) and our clinical features. Sample characteristics selected include age, as well  
211 as neuropathological neuritic plaque (CERAD) and neurofibrillary tangle (Braak) scores  
212 (**Supplemental Table 1**). Both CERAD and Braak scales are neuropathological metrics of  
213 neurodegeneration associated with Alzheimer's and Parkinson's Disease, respectively (Burke et  
214 al., 2008; Fillenbaum et al., 2008). Repeat-dense modules had mild correlations of  $<|0.2|$  with age  
215 of death, with DLPFC's Brown and Salmon modules having  $p\text{-value}=9e-04$  and  $p\text{-value}=0.009$ ,



216 respectively (**Figure 2E**). Both hippocampus' repeat-dense modules had a negative correlation  
217 with age of death at ( $R=-0.19$ ,  $p=9e-04$ ; Pearson correlation) and ( $R=-0.15$ ,  $p=0.009$ ; Pearson  
218 correlation), respectively. In contrast, repeat-dense modules positively correlate ( $>0.2$ ) with both  
219 CERAD and Braak scores in both the caudate nucleus and DLPFC (**Figure 2E**). In the caudate,  
220 the Light Cyan module correlates moderately with Braak score ( $R=0.28$ ,  $p=3e-6$ ; Pearson  
221 correlation) and is composed of 100% repeats. In the DLPFC, the Brown module correlates  
222 moderately with CERAD score ( $R=0.32$ ,  $p=4e-8$ ; Pearson correlation).

223  
224 The DLPFC Brown module is composed of 72.71% repeats and 27.29% genes. We next  
225 assessed the biological function of the genes contained in these repeat-dense modules. Thus,  
226 we performed gene ontology (GO) enrichment analysis on all clusters to identify enrichment of  
227 molecular function, biological processes, and cellular compartments with particular interest in GO  
228 enrichment of repeat-dense clusters containing genes (**Supplemental Table 4**). GO analysis of  
229 the DLPFC Brown module, caudate Light Cyan module, and caudate Yellow module revealed  
230 enrichment of genes associated with RNA and protein binding, RNA processing, and molecular  
231 functions associated with neurodegeneration including ubiquitin-protein transferase activity and  
232 ubiquitin conjugating enzyme (**Figure 2E, 2F; Supplemental Figure 3A**). These results suggest  
233 repeats correlate with clinical metrics of neurodegeneration.

### 234 235 **Age-associated gene modules enriched for immune response and transcriptional** 236 **regulation**

237 Gene expression is known to change with age (de Magalhães et al., 2009), therefore, we also  
238 investigated GO enrichment of gene-dense modules that correlate with age of death. There were  
239 several gene-dense clusters that have a strong, positively correlated relationship with age of  
240 death including DLPFC's blue and Hippocampus' yellow module (**Supplemental Table 3, 4**). The  
241 DLPFC's Blue module ( $n= 3329$  genes and 20 repeats) correlated negatively with age of death

242 (R=-0.40, p=2e-12) was enriched for genes associated with transcriptional regulation by RNA Pol  
243 II (**Supplemental Figure 3B**). The hippocampus' Yellow module (n=1925 genes and 11 repeats)  
244 correlated positively with age of death (R=0.55, p=2e-25) and was enriched for genes associated  
245 with immune response, inflammatory response, and defense response to virus (**Supplemental**  
246 **Figure 3C**). Together, these results support that gene-dense modules hold meaningful  
247 information about brain age.

248

### 249 **Figure 3. Repeats are differentially expressed between human brains 0-15 vs. 60+ years.**

250 A) Total number of DERs across differential expression comparisons with brains >60 years. B)  
251 Volcano plot visualizing 0-15 vs. 60y+ DERs by fold change and FDR. C) Most significant 0-15  
252 vs. 60+ DER in caudate nucleus, L1P3b (FDR=2.17e-21, log<sub>2</sub>(fold change)=1.18). D) Most  
253 significant 0-15 vs. 60+ DER in DLPFC, GSAT (FDR=9.15e-15, log<sub>2</sub>(fold change)=2.66). E) Most  
254 significant 0-15 vs. 60+ DER in hippocampus, TTCATn (FDR=9.55e-7, log<sub>2</sub>(fold change)=1.42).  
255 F) R-RHO plot depicting concordance between 0-15 vs. 60y+ DERs between brain regions.

256

### 257 **Identification of differentially expressed repeats across lifespan of neurotypical brain:** 258 **brain regions show distinct repeat family association with aging**

259 We hypothesized a differential expression (DE) analysis, comparing repeat expression between  
260 over age, could identify differentially expressed repeats (DER) that are potential biomarkers of  
261 the neurotypical aging brain. To perform this analysis, we utilized samples binned by age  
262 (Prenatal; 0-15; 16-29; 30-39; 40-49; 50-59; 60+) where each age bin contained an adequate  
263 sample size with a minimum of 25 samples. (**Figure 1B, Supplemental Table 5**). Prenatal  
264 samples were only available for hippocampus and DLPFC.

265

266 Using counts generated with featureCounts (**Methods**), residualized expression was generated  
267 using covariates via voom linear model. In this analysis, we controlled for the effect of biological

268 sex, self-reported race, ancestry (SNP PCs 1-3), and RNA quality (RIN, mitochondria mapping  
269 rate, gene assignment rate, genome mapping rate, and hidden effects using surrogate variable  
270 analysis) (**Methods; Model 1, Differential Expression Analyses, Eq.5**), with age as our variable  
271 of interest. Criteria for a differentially expressed repeat (DER) was a false discovery rate (FDR) <  
272 0.05. Differential expression identified 21696 DERs across all three brain regions representing  
273 16.58% of all repeats analyzed (**Supplemental Figure 4A, Supplemental Table 6**). For contrast,  
274 differential expression analysis from TEcount resulted in 13489 DERs (**Supplemental Table 7**).  
275

276 Given age is a primary risk factor for many neurodegenerative diseases, and prenatal samples  
277 were not available for caudate nucleus, we further investigated DERs between 0-15 vs. 60+ years  
278 of age, identifying 1,401 instances between ages 0-15 and 60+ across all three brain regions  
279 (**Figure 3A**). When stratifying DERs by significance (FDR<0.05) and magnitude of change, we  
280 observed the majority of young (0-15 years) versus older (60+ years) DERs have a relatively small  
281 fold change ( $\log_2(\text{fold change}) < 0.5$ ) across all three brain regions (**Figure 3B**).

282 Across the caudate nucleus, DLPFC, and hippocampus, the most significant DERs between  
283 young (0-15 years) and older (60+ years) individuals belonged to distinct repeat families. In the  
284 caudate nucleus, the most upregulated DER was the LINE repeat L1P3b (FDR=2.17e-21). The  
285 DLPFC showed the greatest increase in centromeric GSAT repeats (FDR=9.15e-15), while the  
286 hippocampus exhibited the strongest upregulation of the satellite repeat TTCATn (FDR=9.55e-7)  
287 (Figure 3C-E). To explore consistency in DER patterns across brain regions, we employed Rank-  
288 Rank Hypergeometric Overlap (RRHO) analysis (Plaisier et al., 2010). This analysis revealed the  
289 strongest concordance in the direction of change (up or downregulation) between DERs in the  
290 caudate nucleus and DLPFC (Figure 3F). Concordance was weaker between the DLPFC and  
291 hippocampus, and the hippocampus and caudate nucleus. All three brain regions exhibited an  
292 increase in expression from young (0-15 years) to older (60+ years) groups (**Supplemental**  
293 **Figure 4B**).

294

295 Age-related repeat expression is brain region specific

296 Discussions of repeat expression are often centered around increases in repeat expression, as it  
297 poses threat to genomic stability and cellular homeostasis. In our analysis, we unbiasedly  
298 captured DERs with  $FDR < 0.05$ , regardless of directionality of change. To test whether repeat  
299 expression ubiquitously increases with age, we stratified 0-15 vs. 60+ DERs by the sign (positive  
300 or negative) of  $\log_2(\text{fold change})$  (**Supplemental Table 6**). We identified 549 DERs (403  
301 upregulated, 146 downregulated) in caudate nucleus, 233 DERs (92 upregulated, 233  
302 downregulated) in DLPFC, and 629 DERs (25 upregulated, 629 downregulated) in hippocampus  
303 (**Supplemental Figure 5A, 5B**). While 73.40% of caudate nucleus DERs are upregulated in  
304 brains >60 years, 96.02% hippocampus DERs are downregulated in brains >60 years.

305

306 To test if the observations were representative across multiple categories of repeats, we  
307 investigated the behavior of LINEs, LTRs, SINEs, and satellite repeats present within 0-15 v. 60+  
308 DERs (**Figure 4A-D**). LINEs and LTRs were the most abundant categories present within 0-15  
309 vs. 60y+ DERs and shared similar patterns of upregulation in caudate nucleus >60y and  
310 downregulation in hippocampus >60 years (**Figure 4A, 4B; Supplemental Table S6**).  
311 Interestingly, despite moderate correlation between total repeat expression and age in the  
312 hippocampus ( $R=0.17$ ; **Figure 2B**), hippocampus DERs are primarily downregulated in brains  
313 between 0-15 and 60+ years. This suggests a small subset of non-differentially expressed repeats  
314 may drive global correlation of repeat expression-age and are not representative of more nuanced  
315 changes in repeat expression with age.

316

317 **Figure 4. LTRs are over-represented in differential expression results.** A-D) Total number of  
318 0-15 vs. 60+ DERs downregulated (red) vs upregulated (blue), stratified by LINE, SINE, LTR, and  
319 satellite repeats E-H) Over representation analysis of LINE, SINE, LTR, and satellite repeats

320 within DER results across all comparisons and brain regions (DER = differentially expressed  
321 repeat, LINE = Long Interspersed Element, LTR = Long Terminal Repeat, SINE=Short  
322 Interspersed Repeat)

323

#### 324 LTRs are over-represented within differential expression results

325 Given the unique behavior of differentially expressed repeats across brain regions, we wanted to  
326 see if any repeat classes were more likely to be differentially expressed. To test if LINEs, LTRs,  
327 SINEs, or satellite repeats were over-represented within our differential expression results, we  
328 performed the Hypergeometric distribution test, implemented by the SuperExactTest package. This  
329 methodology calculates the significance of the intersection between two sets of elements (repeats),  
330 considering a fixed background population (all unique annotated repeats, **Methods**). With this  
331 approach, we can assess if a specific differentially expressed repeat is overrepresented within its  
332 own repeat super family, compared to what would be expected by chance, considering all repeats  
333 annotated in our custom .gtf file (**Methods**). Results from each individual comparison performed  
334 across all three brain regions are shown in **Figure 4E-H**. We quickly identified a striking over-  
335 representation of LTR elements within our differential expression results including within 0-15 vs.  
336 60y comparison across all three brain regions (**Figure 4F**).

337

#### 338 **Figure 5. HERV-K expression increases from 0-15 vs. 60+ years in all three brain regions.**

339 A) Venn diagram of 0-15 vs. 60+ DERs across brain regions B) Distribution of repeat classes  
340 within shared 0-15 vs. 60+ DERs across all three tissues C) List of 17 LTR 0-15 vs. 60+ DERs  
341 shared across all three tissues D) Correlation between total expression of HERV-K-int and age of  
342 death by brain region E) Expression of HERV-K-int across age bins, by brain region.

343

344 Age contributes to differential expression of HERV-K in brain

345 Given LTRs are abundant and overrepresented within 0-15 vs 60+ DERs across all three brain  
346 regions, we then wanted to evaluate if any differentially expressed LTRs were shared between the  
347 caudate nucleus, DLPFC, and hippocampus. Out of the 1401 0-15 vs 60+ DERs identified, 36 DERs  
348 were shared between all three tissues (**Figure 5A**). Of these, 17 were LTRs and 10 were satellite  
349 repeats (**Figure 5B**). Further investigation into 17 shared LTRs yielded identification of human  
350 endogenous retrovirus-K-int (HERV-K-internal sequences), a human-specific LTR, as a significant  
351 0-15 vs 60y+ DER across caudate nucleus (FDR=0.011;), DLPFC (FDR=0.043), and hippocampus  
352 (FDR=0.00026) (**Figure 5C**).

353 Previously, HERVs have been identified as being dysregulated in neurological disorders including  
354 multiple sclerosis (Brudek et al., 2009; Laufer et al., 2009; Schmitt et al., 2013). Age is a risk factor  
355 for multiple sclerosis, thus, we asked if total LTR, HERV, or HERV-K expression correlated with  
356 brain age in our samples. We observed that total LTR expression has the highest Spearman Rank  
357 Correlation ( $R=0.077$ ,  $p=0.024$ ; test) out of all repeat categories analyzed (**Supplemental Figure**  
358 **6A**). When we look at total HERV-K expression, a subcategory of LTR elements, we see HERV  
359 only mildly expression correlates with brain age ( $R=0.033$ ,  $p=0.0024$ ; test) and when plotted by  
360 brain region, is similar across caudate nucleus ( $R=0.068$ ,  $p=0.00045$ ), DLPFC ( $R=0.051$ ,  
361  $p=0.0059$ ), and hippocampus ( $R=0.044$ ,  $p=0.014$ ) **Supplemental Figure 6B, 6C**). Importantly,  
362 when plotting total HERV-K expression, we observe a strong and significant positive correlation  
363 with brain age across all three brain regions. Total expression of HERV-K has the highest  
364 correlation with brain age in the DLPFC (**Figure 5D**,  $R=0.4$ ,  $p=1.8e-12$ ). Boxplots further confirm  
365 HERV-K expression increases with age in the neurotypical caudate nucleus, DLPFC, and  
366 hippocampus (**Figure 5E**).

367 Re-investigating the co-expression analysis, we observe HERV-K-int clusters into the DLPFC  
368 Brown module containing 1718 repeats and 645 genes (**Supplemental Table XX**). Of the 1718  
369 repeats, 61 (3.55%) are both human endogenous retrovirus and a highly connected feature (hub)  
370 of the DLPFC Brown network. Of the 61 repeats that serve as hubs, 13 (21.3%) are from HERV-K  
371 subfamily, including HERV-K-int. All HERV-K hubs are all classified as intramodular hubs, hubs that  
372 are highly connected within the DLPFC Brown module and drive architecture of network, as  
373 indicated by a high  $k_{\text{Within}}$  and positive  $k_{\text{Diff}}$  values (**Supplemental Table S8**, Bogenpohl et al.,  
374 2016). As previously mentioned, the DLPFC Brown module shows a significant positive correlation  
375 with CERAD score ( $r=0.32$ ,  $p<4e-08$ ) (**Figure 2E**) indicating a potential relationship with HERV-K  
376 expression and neuropathological protein aggregation.

377  
378 GO analysis of genes in the DLPFC Brown module are enriched for molecular functions of protein  
379 and RNA binding (**Figure 2F**). Together, this data suggests expression of HERV-K-int correlates  
380 with brain age and shares co-expression patterns with several pathways critical to cellular  
381 homeostasis that have been previously implicated in the aging brain (Ham & Lee, 2020).

## 382 383 **Discussion**

384 In this study, we re-processed and re-quantified paired-end, stranded RNA-sequencing data from  
385 885 neurotypical samples across the caudate nucleus, DLPFC, and hippocampus from 395  
386 human, postmortem BrainSeq consortium donors (Benjamin et al., 2022; Collado-Torres et al.,  
387 2019) to build a repeat expression atlas of the aging human brain. Using co-expression networks,  
388 we placed repeat-derived RNAs within the brain's transcriptional network to discover biologically  
389 relevant relationships between repeats and genes.

390

391 The impact of genomic instability, epigenetic alterations, and altered cellular communication, all  
392 hallmarks of aging, are not exclusive to genes and likely impact global expression (López-Otín et  
393 al., 2013; Yamamoto et al., 2022). The interconnectedness between repeat and gene expression  
394 has largely been understudied in the context of aging until recently. Through WGCNA, we  
395 identified that repeats generally cluster together into repeat-dense modules, an expected result  
396 given that repeats are the target of shared regulatory mechanisms at the transcriptional and post-  
397 transcriptional levels. Gene-dense modules appear to hold more information about brain age, an  
398 expected result given previous studies on age-related expression changes in the brain.  
399 Interestingly, repeat-dense modules correlate with CERAD and Braak scores, suggesting a  
400 relationship between repeat expression and neuropathological hallmarks of disease, independent  
401 of age (Yamamoto et al., 2022). For example, the repeats in Light Cyan module in caudate  
402 consists exclusively of LINE-1 elements, sequences harboring conserved potential G-quadruplex  
403 (G4) forming sequences in their 3' end which are associated with increased retrotransposition  
404 (Sahakyan et al., 2017). Notably, LINE-1s have been associated with G4 formation in Alzheimer's  
405 disease induced pluripotent stem cells derived neurons (Hanna et al., 2021), being an intragenic  
406 feature reducing gene expression and potentially affecting the transcriptional programs.

407  
408 We then went on to identify 21696 DERs (FDR<0.05) across the caudate nucleus, DLPFC, and  
409 hippocampus with the DLPFC containing the fewest DERs, mimicking differential expression  
410 results reported in Collado-Torres et al., 2019. We observed an overrepresentation of LTRs within  
411 our DER results and among our 0-15 vs. 60y+ DER results, we identified 17 LTRs that were  
412 shared across caudate nucleus, DLPFC, and hippocampus. Of these 17, we observed HERV-K  
413 increases with brain age and is upregulated in brains >60 years.

414  
415 While we do not observe a strong global relationship between repeat expression and age, we  
416 identified HERV-K as a repeat signature associated with the aging neurotypical brain. Not only is



417 HERV-K-int a shared DER across all three brain regions, but its total expression is moderately  
418 correlated with brain age and stronger than the correlation of total expression HERV-K element  
419 expression with brain age. A recent study supports the connection between endogenous  
420 retrovirus expression and cellular senescence indicating HERV-derived proteins, including  
421 HERV-K, can serve as a biomarker of tissue aging across lung, liver, and skin (36610399). Our  
422 study expands upon this observation to confirm HERV-K RNA is a biomarker of aging across the  
423 brain, broadening and strengthening HERV-K's position in the diagnostic and therapeutic  
424 landscape of age-related neurodegeneration.

425  
426 LTRs, more specifically HERVs, have also been associated with neurological disease (Dembny  
427 et al., 2020; Macías-Redondo et al., 2021). HERV-derived RNA is capable of causing and  
428 propagating neurodegeneration through Toll-like receptors (Dembny et al., 2020) and protein  
429 aggregation (Liu et al., 2023). Beyond the production HERV RNA species, Turelli et al. observed  
430 the regulatory impact of HERV-K also stems harboring transposable element-embedded  
431 regulatory sequences (TEeRS) and subsequently altering KRAB-ZFP, a transcriptional repressor,  
432 binding to neuronal genes (Turelli et al. 2020). We observe HERV-K-int, along with other HERV-  
433 K sequences, are intramodular hubs within our DLPFC and hippocampus co-expression networks  
434 suggesting this LTR maintain and/or regulate biologically important relationships within a brain  
435 region. Repeat-derived products, including repeat-derived RNAs, are not only capable of  
436 propagating neurodegeneration through a pro-inflammatory response - thus contributing to  
437 disease progression (Dembny et al., 2020); but also in some forms of cancer through the ubiquitin-  
438 proteasome pathway (Jin et al., 2019) and on aging phenotype (Gorbunova et al., 2021). Thus,  
439 we also propose elevated HERV-K products in neurological disease may reflect a molecular  
440 phenotype of accelerated aging that further drives transcriptional and proteomic hallmarks of  
441 neurodegeneration.

442

443 Comprehensively, our work provides the largest global assessment of repeat expression across  
444 the aging neurotypical brain and refutes previous generalizations of repeat behavior. While  
445 epigenetic alterations may change transcriptional landscape with age, we find repeat expression  
446 shows high developmental and regional specificity making age only one important factor for  
447 characterizing repeat behavior in a healthy aging tissue. We hope this global assessment will  
448 serve as a resource to the greater scientific community.

449  
450 Thus, as repeat expression becomes a popular target for biomarkers, diagnostics, and  
451 therapeutics, our findings highlight the need to identify baseline expression dynamics of target  
452 repeats in healthy tissues. As such, we anticipate this data will be used as a neurotypical baseline  
453 for analyzing neurodevelopmental and neurodegenerative disease-related changes in repeat  
454 expression.

455

456

## 457 **Methods**

458

### 459 **Sample Selection**

460 The LIBD BrainSeq Consortium consists of several brain regions and includes a wide range of  
461 demographics and RNA-sequencing library preparation. We selected samples from the caudate  
462 nucleus, DLPFC, and hippocampus based on three inclusion criteria: 1) Stranded RiboZero RNA-  
463 sequencing library preparation, 2) primary diagnosis of neurotypical control, and 3) self-reported  
464 ancestry of either African American or European American. This resulted in a total of 395 unique  
465 individuals for a total of 885 FASTQ files across the three brain regions.

466

### 467 **RNA-sequencing Data Processing**

468 We downloaded FASTQ files from the BrainSeq Consortium (Benjamin et al., 2022; Jaffe et al.,  
469 2018; Schubert et al., 2015). The reads were aligned to the hg38/GRCh38 human genome  
470 (GENCODE release 26, GRCh38.p10) using HISAT2 (v2.1.0) (Kim et al., 2019). Following  
471 genome alignment, we sorted and indexed the BAM files using SAMtools (v1.9) (Danecek et al.,  
472 2021) with HTSlib (v1.9) (Bonfield et al., 2021). We examined alignment and read quality with  
473 RSeQC (v3.0.1) (L. Wang et al., 2012). We generated gene and repeat counts from both multi  
474 mapping (expression and downstream analysis) and unique mapping (co-expression analysis)  
475 using Tetranscripts (v2.2.1) (Jin et al., 2015) and featureCounts (v2.0.1) (Liao et al., 2014).

476

#### 477 **Generating Counts from Multi-Mapping Reads and Repeat Annotation**

478 For Tetranscripts, we generated gene and repeat counts in one step using TEcount for paired  
479 end, reversed stranded reads with default parameters and the GTF file of genes and repeats  
480 provided by the Hammel Lab (<http://hammellab.labsites.cshl.edu/software/>). Additionally, we  
481 used featureCounts to generate gene and repeat counts in one step with a customized GTF file  
482 of genes and repeats. For the GTF file generation, we combined the GENCODE release 26 with  
483 repeat annotation obtained from downloading the repeat masker track for hg38 from the UCSC  
484 Table Browser followed by annotating strand information with a python script. We generated  
485 counts with featureCounts using the following parameters: 1) paired end, 2) reversed stranded  
486 reads, 3) primary alignments only, 4) excluding chimeric reads, 5) allowing for multi-mapping  
487 reads and, 6) one base as the minimum overlapping fraction in a read.

488

#### 489 **Quality Control**

490 For quality control, we first aggregate results for RSeQC and HISAT2 with MultiQC (Ewels et al.,  
491 2016). To determine outliers, we first combined the read, alignment, and RNA quality (RIN: RNA  
492 Integrity Number and mitochondria mapping rate) for each tissue and scaled the data before  
493 applied dimensional reduction with PCA (principal component analysis) with the scikit-learn

494 package (Pedregosa et al., 2011). Following dimensional reduction, we calculated the distance  
495 from the centroid for all samples (**Equations 1 & 2**) and excluded samples that were outside of  
496 the 99 percentile (caudate and hippocampus) and 95 percentile (DLPFC). This resulted in a total  
497 of 861 samples for caudate (n=268), DLPFC (n=287), and hippocampus (n=306).

498

$$499 \quad \textit{centroid} = \frac{1}{n} \sum_{i=0}^n x_i \quad \textbf{(Equation 1)}$$

500

$$501 \quad \textit{distance from centroid} = \sum_{j=0}^k (x_j - \textit{centroid})^2 \quad \textbf{(Equation 2)}$$

502

### 503 **Low expression filtering and library normalization**

504 To filter out low expression counts, we first constructed an edgeR object (McCarthy et al., 2012;  
505 Robinson et al., 2009) of brain regions with sample information as well as raw counts. Following  
506 this, we applied filterByExpr (Chen et al., 2016) from edgeR for genes and repeats together with  
507 an interacting design matrix (**Equation 3**). This function keeps features (genes and repeats) that  
508 have count-per-million (CPM) above a minimum count (10 CPM) in 70% of the smallest group  
509 sample size. The smallest group sample size is determined by the design matrix. Furthermore,  
510 each feature must have a minimum number of counts across all samples (15 CPM). After filtering,  
511 we had a total of 28443, 28058, and 28740 genes and repeats for the caudate nucleus, DLPFC,  
512 and hippocampus, respectively for the TETranscripts method. For the featureCounts methods, this  
513 resulted in 24861, 24545, and 25022 genes and repeats for the caudate nucleus, DLPFC, and  
514 hippocampus, respectively. After filtering, we normalized the library size of genes and repeats  
515 together using trimmed mean of M-values (TMM).

516

$$517 \quad E(Y) = \beta_0 + \beta_1 \textit{AgeGroup} \quad \textbf{(Equation 3)}$$

518

## 519 **Repeat Expression Analyses**

520

### 521 Expression residualization

522 For residualized expression, we regressed out covariates using limma-voom normalized  
523 expression and null models created without the variable of interest (**Equation 5**) as previously  
524 described in Benjamin et al. 2022. Following this, a z-score transformation was performed.

525

$$526 \quad E(Y) = \beta_0 + \beta_1 \text{Race} + \beta_2 \text{Sex} + \beta_3 \text{MitoRate} + \beta_4 \text{TotalAssignedGenes} + \\ 527 \quad \beta_5 \text{OverallMappingRate} + \beta_6 \text{RIN} + \sum_{i=1}^3 \eta_i \text{snpPC}_i + \sum_{j=1}^k \gamma_j \text{SV}_j \quad \text{(Equation 4)}$$

528

### 529 Differential expression analyses

530 For differential expression analyses, we applied voom normalization law (Law et al., 2014) on the  
531 normalized filtered counts for genes and repeats together (**Low expression filtering and library**  
532 **normalization**), adjusted with the model covariates listed below (Leek et al., 2012) (**Equation 4**).  
533 Differentially expressed features were identified using the eBayes (Smyth; Hall, 2009) function  
534 from limma (Ritchie et al., 2015) for the age group fitted model. Features with a FDR < 0.05 were  
535 considered as differentially expressed.

536

$$537 \quad E(Y) = \beta_0 + \beta_1 \text{AgeGroup} + \beta_2 \text{Race} + \beta_3 \text{Sex} + \beta_4 \text{MitoRate} + \beta_5 \text{AlignmentRate} + \\ 538 \quad \beta_6 \text{UnmappingRate} + \beta_7 \text{RIN} + \sum_{i=1}^3 \eta_i \text{snpPC}_i + \sum_{j=1}^k \gamma_j \text{SV}_j \quad \text{(Equation 5)}$$

539

540 Covariates included sex, self-reported race, ancestry (SNP PCs 1-3), and RNA quality (RIN,  
541 mitochondria mapping rate, alignment rate, genome unmapping rate, and hidden variance using  
542 surrogate variable analysis (SVA)).

543

### 544 Repeat Superfamily Hypergeometric Analysis

545 To evaluate the representation of repeat superfamilies in each differential expression result, we  
546 applied the supertest function from SuperExactTest (Wang et al., 2015). For superfamily analysis,  
547 we utilized the total number of repeats ( $n = 30938$ ) included in the custom GTF file as background  
548 population. We then used the intersection between the set of repeats of a repeat superfamily (i.e.  
549 all 342 LINEs repeats present in our GTF file) with the total number of differentially expressed  
550 repeats within the same repeat family, obtained in each age comparison analysis. We performed  
551 the Hypergeometric test in 16 repeat super families. The P-values were calculated by the same  
552 function considering only the upper tail of the distribution of each intersection.

553

## 554 **WGCNA analyses**

555

### 556 Generating Counts from Uniquely Mapped Reads

557 Considering the uneven distribution of repeats across the genome and high sequence similarity,  
558 we also generated counts from uniquely mapped reads to reduce artifacts introduced by  
559 evolutionarily young repeats (Parsana et al., 2019). We generated counts with featureCounts  
560 using the following parameters: 1) paired end, 2) reversed stranded reads, 3) primary alignments  
561 only, 4) excluding chimeric reads, 5) excluding multi-mapping reads and, 6) one base as the  
562 minimum overlapping fraction in a read.

563

### 564 Co-expression Analysis

565 We used the Weighted Correlation Network Analysis (WGCNA) to create co-expression networks  
566 for each brain region and identify co-expression modules (Langfelder & Horvath, 2008). As an  
567 input we used the residualized expression previously described (**Equation 5**), with genes and  
568 repeats together, from featureCounts. We analyzed each brain region in separate, using all age  
569 groups from each tissue. We select a  $\beta = 14$ , (a value with all networks achieved a scale-free  
570 independence index of  $R^2 \geq 0.8$ ), using the following parameters: signed network, mergecutheight

571 = 0.25, deepsplit = 2, and minimum module size = 30 (Feltrin et al., 2019). Each individual module  
572 eigengene value (kME) were correlated with the following co-variables: self-reported race, sex,  
573 age of death, RIN, pH, PMI, MitoRate, AlignmentRate, CERAD/BRAAK scores and each one of  
574 the 6 age groups. Modules with a Pearson correlation coefficient p-value < 0.05 were considered  
575 as significant associations. For the identification of hub genes of each module, we selected all the  
576 genes/repeats selected by the WGCNA function `intramodularConnectivity()`.

577

### 578 CERAD/BRAAK Scores

579 A subset of 108 samples representing 57 unique individuals were analyzed by a Lieber Institute  
580 for Brain Development neuropathologist. All 108 samples were given both a CERAD scores (1-4)  
581 and BRAAK score (1-4).

582

### 583 Gene term enrichment analysis

584 For gene term enrichment analysis, we utilized GOATOOLS, a Python package using  
585 hypergeometric tests with the Gene Ontology (GO) database (Klopfenstein et al., 2018). The GO  
586 database included molecular functions (MF), cellular components (CC), and biological processes  
587 (BP), however, MF and BP were primarily used for analyses.

588

### 589 **Code and data availability**

590 Code will be available at <https://github.com/orgs/paquolalab>.

591

### 592 **Supplemental Figures**

593 **Figure S1. Selection of repeat quantification method. A)** Breakdown of post-mortem  
594 samples by sex. **B)** Overlap of quantifiable repeats on positive strand by featureCounts and  
595 TEcounts. **C)** Overlap of all quantifiable repeats features by featureCounts and TEcounts. **D)**

596 Breakdown of categories of quantifiable repeats in TEcounts GTF file. **E)** Breakdown of  
597 categories of quantifiable repeats in featureCounts GTF file. **F)** Correlation between  
598 featureCounts and TEcounts, raw counts of L1HS. **G)** Correlation between featureCounts and  
599 TEcounts, raw counts of SVA\_F.

600  
601 **Figure S2. Co-expression defines correlation of repeat-dense WGCNA modules with**  
602 **clinical traits.** A) WGCNA module-trait correlation heatmap across caudate nucleus samples.  
603 B) WGCNA module-trait correlation heatmap across DLPFC samples. C) WGCNA module-trait  
604 correlation heatmap across hippocampus samples.

605  
606 **Figure S3. Gene ontology enrichment of gene- and repeat-dense WGCNA modules.** A) Gene  
607 ontology enrichment of gene-dense DLPFC blue module B) Gene ontology enrichment of gene-  
608 dense hippocampus Yellow module C) Gene ontology enrichment of repeat-dense caudate  
609 nucleus Yellow module D) Gene ontology enrichment of repeat-dense hippocampus Brown  
610 module.

611  
612 **Figure S4. Distribution of differentially expressed repeats (DERs) across lifespan of**  
613 **neurotypical brain.** A) Total differentially expressed repeats (DERs) across each age  
614 comparison in caudate nucleus, DLPFC, hippocampus. B) Upset Plot with the distribution of  
615 unique and shared 0-15 vs. 60y+ DERs by brain region.

616  
617 **Figure S5. Directionality of DERs across lifespan of neurotypical brain.** A) Up- and  
618 downregulated 0-15 vs. 60y+ DERs across each brain region. B) Up- and downregulated DERs  
619 across age comparisons by brain region.

620



621 **Figure S6. LTR and HERV-K expression correlates with age of death.** A) Correlation of total  
622 LTR expression with age of death across all brain regions. B) Correlation of total HERV  
623 expression with age of death across all brain regions. C) Correlation of total HERV expression  
624 with age of death across each individual brain region.

625

## 626 **Supplemental Tables**

627 **Table S1. Sample clinical data.** Information regarding all samples included in this project.

628

629 **Table S2. Scale-free topology fit index for each tissue-specific network (WGCNA).** Values  
630 obtained from pickSoftThreshold() function, to calculate the appropriate Beta of each region's co-  
631 expression network (Caudate, DLPFC and Hippocampus).

632

633 **Table S3. WGCNA modules composition and features annotation for caudate nucleus,**  
634 **DLPFC, and hippocampus' co-expression networks.** For the annotated genes, information  
635 regarding its chromosomal location is provided. For each repeats, information from its family and  
636 main class (obtained by RepeatMasker annotation) are also included. Features clustered in the  
637 'grey' (null) module were excluded for further downstream analysis. Features without the module  
638 identification were absent for the WGCNA analysis of its respective co-expression network  
639 analysis.

640

641 **Table S4. Gene Ontology enrichment results for each WGCNA co-expression module for**  
642 **caudate nucleus, DLPFC and hippocampus co-expression networks.** Results were obtained  
643 with the GOATOOLS package. Only GO pathways with a FDR < 0.05 were considered as either  
644 enriched ('e') or depleted ('p'). GO: Gene Ontology; NS: Gene Ontology Category; BP: Biological  
645 Process; MF: Molecular Function; CC: Cellular Component.

646

647 **Table S5. Power Analysis.** Power was derived from the sample sizes of each differential  
648 expression age group: Prenatal, A (0-15), B (16-29), C (30-39), D (40-49), E (50-59), F (60+),  
649 using TTestIndPower and FTestPower functions from Python's statsmodels.stats.power.

650

651 **Table S6. Differential expression analysis applying limma-voom to features quantified by**  
652 **featureCounts algorithm.** Only features with a Benjamini-Hochberg false discovery rate (FDR)  
653  $< 0.05$  were considered as differentially expressed and included. AveExpr: average expression  
654 across all samples; logFC: estimate of the log<sub>2</sub>-fold-change corresponding to the effect; t:  
655 moderated t-statistic; B: log-odds that the gene is differentially expressed.

656

657 **Table S7. Differential expression analysis applying limma-voom and features quantified by**  
658 **TEcount algorithm.** Only features with a Benjamini-Hochberg false discovery rate  $< 0.05$  were  
659 considered as differentially expressed and included. AveExpr: average expression across all  
660 samples; logFC: estimate of the log<sub>2</sub>-fold-change corresponding to the effect; t: moderated t-  
661 statistic; B: log-odds that the gene is differentially expressed.

662

663 **Table S8. Top intramodular hubs from each WGCNA module.** List of features (genes and/or  
664 repeats) that serve as intramodular hubs determined by the intramodularConnectivity.fromExpr()  
665 function. kTotal = total connectivity; kWhitin = intramodular connectivity; kOut = extra-modular  
666 connectivity; kDiff = the difference between the intra-modular and extra-modular connectivity.

667

#### 668 **Data Availability**

669 Raw data (.fastq files) are available under restricted access to protect research subjects. For total  
670 RNA data from prefrontal cortex and hippocampus, researchers can access the files via the  
671 Globus collections (jhpce#bsp2-dlpcf and jhpce#bsp2-hippo) at <https://research.libd.org/globus/>.

672 For caudate nucleus data, researchers can obtain access to FASTQ files via dbGaP accession  
673 phs003495.v1.p1 at <https://www.ncbi.nlm.nih.gov/gap/> .

674

## 675 **Acknowledgements**

676 The authors gratefully acknowledge the families that have donated this tissue to the advancement  
677 of science. The authors would like to extend their appreciation to the Offices of the Chief Medical  
678 Examiner of Washington DC, Northern Virginia, Kalamazoo Michigan, Santa Clara County,  
679 University of North Dakota, and Maryland for the provision of brain tissue used in this work. The  
680 authors also extend their posthumous appreciation to to Dr. Llewellyn B. Bigelow and members  
681 of the LIBD Neuropathology Section for their work in assembling and curating the clinical and  
682 demographic information and organizing the Human Brain Tissue Repository of the Lieber  
683 Institute. We thank Dr. Alan Lorenzetti for the thoughtful feedback on this manuscript. We thank  
684 Johns Hopkins School of Medicine, Cellular and Molecular Medicine Graduate Program for  
685 additional support.

686

## 687 **Ethics Statement & Financial Disclosure**

688 All sample identifiers used in this study are de-identified IDs and cannot reveal the identity of the  
689 study subjects. Additionally, all available sample clinical information also cannot reveal the identity  
690 of the study subjects. D.R.W. serves on the Scientific Advisory Boards of Sage Therapeutics and  
691 Pasithea Therapeutics. J.E.K. has served as a consultant for Merck on an antipsychotic drug trial.  
692 All other authors declare no competing interests. This work is supported by the Lieber Institute for  
693 Brain Development. JAE is supported by a NARSAD Young Investigator Grant from the Brain and  
694 Behavior Research Foundation and Collaborative Center For X-Linked Dystonia Parkinsonism  
695 and the MGH Collaborative Center for X-Linked Dystonia-Parkinsonism. JAE and ASF are  
696 supported by the Maryland Stem Cell Research Foundation. KJB is supported by T32 fellowship  
697 (T32MH015330) and K99 award (K99MD016964).

698

## 699 **Contributions**

700

701 This work was collaborative, and many people contributed to many aspects of the project.  
702 Previously published postmortem sample collection and RNA sequencing were directed by Tom  
703 Hyde, Joel Kleinman and Daniel Weinberger at Lieber Institute for Brain Development. Repeat  
704 quantification was performed by Kynon Benjamin, Taylor Evans, Arthur Feltrin, Tarun Katipalli  
705 and Apua Paquola. WGCNA was largely conducted by Arthur Feltrin. Analysis and visualization  
706 of WGCNA results were largely conducted by Taylor Evans and Arthur Feltrin. Differential  
707 expression was performed by Kynon J Benjamin, Tarun Katipalli and Apua Paquola. Analysis and  
708 visualization of differential expression results was largely conducted by Taylor Evans with  
709 assistance from Kynon J Benjamin, Tarun Katipalli and Apua Paquola. The manuscript text and  
710 figures were largely performed by Taylor Evans, with assistance from Arthur Feltrin and Jennifer  
711 Erwin. Interpretation of findings was conducted by Taylor A. Evans with assistance from Arthur  
712 Feltrin, Apua Paquola, and Jennifer Erwin. The study was conceptualized and designed by  
713 Jennifer Erwin and Apua Paquola.

714

## 715 **References**

716

717 Benjamin, K.J.M., Chen, Q., Jaffe, A.E., Stolz, J.M., Collado-Torres, L., Huuki-Myers, L.A., Burke, E.E., Arora, R.,  
718 Feltrin, A.S., Barbosa, A.R., Radulescu, E., Pergola, G., Shin, J.H., Ulrich, W.S., Deep-Soboslay, A., Tao, R.,  
719 Matsumoto, M., Saito, T., Tajinda, K. and Hoeppner, D.J. (2022). Analysis of the caudate nucleus transcriptome in  
720 individuals with schizophrenia highlights effects of antipsychotics and new risk genes. *Nature Neuroscience*, 25(11),  
721 pp.1559–1568. doi:<https://doi.org/10.1038/s41593-022-01182-7>.  
722  
723 Bogenpohl, J.W., Mignogna, K.M., Smith, M.L. and Miles, M.F. (2016). Integrative Analysis of Genetic, Genomic, and  
724 Phenotypic Data for Ethanol Behaviors: A Network-Based Pipeline for Identifying Mechanisms and Potential Drug  
725 Targets. In: *Methods in molecular biology*. [online] Springer Science+Business Media, pp.531–549.  
726 doi:[https://doi.org/10.1007/978-1-4939-6427-7\\_26](https://doi.org/10.1007/978-1-4939-6427-7_26).

- 727 Bogu, G.K., Reverter, F., Marti-Renom, M.A., Snyder, M.P. and Guigó, R. (2019). Atlas of transcriptionally active  
728 transposable elements in human adult tissues. *bioRxiv (Cold Spring Harbor Laboratory)*.  
729 doi:<https://doi.org/10.1101/714212>.
- 730 Bonfield, J.K., Marshall, J., Danecek, P., Li, H., Ohan, V., Whitwham, A., Keane, T. and Davies, R.M. (2021). HTSlib:  
731 C library for reading/writing high-throughput sequencing data. *GigaScience*, 10(2).  
732 doi:<https://doi.org/10.1093/gigascience/giab007>.
- 733 Brudek, T., Christensen, T., Aagaard, L., Petersen, T., Hansen, H.J. and Møller-Larsen, A. (2009). B cells and  
734 monocytes from patients with active multiple sclerosis exhibit increased surface expression of both HERV-H Env and  
735 HERV-W Env, accompanied by increased seroreactivity. *Retrovirology*, 6(1). doi:[https://doi.org/10.1186/1742-4690-6-](https://doi.org/10.1186/1742-4690-6-104)  
736 104.
- 737 Chen, Y., Lun, A.T.L. and Smyth, G.K. (2016). *From reads to genes to pathways: differential expression analysis of*  
738 *RNA-Seq experiments using Rsubread and the edgeR quasi-likelihood pipeline*. [online] [f1000research.com](https://f1000research.com).  
739 Available at: <https://f1000research.com/articles/5-1438>.
- 740 Collado-Torres, L., Burke, E.E., Peterson, A.M., Shin, J.H., Straub, R.E., Anandita Rajpurohit, Semick, S.A., Ulrich,  
741 W.S., Price, A.J., Valencia, C., Tao, R., Deep-Soboslay, A., Hyde, T.M., Kleinman, J.E., Weinberger, D.R. and Jaffe,  
742 A.E. (2019). Regional Heterogeneity in Gene Expression, Regulation, and Coherence in the Frontal Cortex and  
743 Hippocampus across Development and Schizophrenia. *Neuron*, 103(2), pp.203-216.e8.  
744 doi:<https://doi.org/10.1016/j.neuron.2019.05.013>.
- 745 Danecek, P., Bonfield, J.K., Liddle, J., Marshall, J., Ohan, V., Pollard, M.O., Whitwham, A., Keane, T., McCarthy,  
746 S.A., Davies, R.M. and Li, H. (2021). Twelve years of SAMtools and BCFtools. *GigaScience*, 10(2).  
747 doi:<https://doi.org/10.1093/gigascience/giab008>.
- 748 de Cecco, M., Criscione, S. W., Peckham, E. J., Hillenmeyer, S., Hamm, E. A., Manivannan, J., Peterson, A. L.,  
749 Kreiling, J. A., Neretti, N., & Sedivy, J. M. (2013). Genomes of replicatively senescent cells undergo global epigenetic  
750 changes leading to gene silencing and activation of transposable elements. *Aging Cell*, 12(2), 247–256.  
751
- 752 de Magalhães, J.P., Curado, J. and Church, G.M. (2009). Meta-analysis of age-related gene expression profiles  
753 identifies common signatures of aging. *Bioinformatics*, 25(7), pp.875–881.  
754 doi:<https://doi.org/10.1093/bioinformatics/btp073>.  
755
- 756 Della Valle, F., Reddy, P., Yamamoto, M., Liu, P., Saera-Vila, A., Bensaddek, D., Zhang, H., Prieto Martinez, J.,  
757 Abassi, L., Celii, M., Ocampo, A., Nuñez Delicado, E., Mangiavacchi, A., Aiese Cigliano, R., Rodriguez Esteban, C.,  
758 Horvath, S., Izpisua Belmonte, J.C. and Orlando, V. (2022). LINE-1 RNA causes heterochromatin erosion and is a  
759 target for amelioration of senescent phenotypes in progeroid syndromes. *Science Translational Medicine*, 14(657).  
760 doi:<https://doi.org/10.1126/scitranslmed.abl6057>.
- 761 Dembny, P., Newman, A.G., Singh, M., Hinz, M., Szczepek, M., Krüger, C., Adalbert, R., Dzaye, O., Trimbuch, T.,  
762 Wallach, T., Kleinau, G., Derkow, K., Richard, B.C., Schipke, C., Scheidereit, C., Stachelscheid, H., Golenbock, D.,

- 763 Peters, O., Coleman, M. and Heppner, F.L. (2020). Human endogenous retrovirus HERV-K(HML-2) RNA causes  
764 neurodegeneration through Toll-like receptors. *JCI Insight*, 5(7). doi:<https://doi.org/10.1172/jci.insight.131093>.
- 765 Ding, S., Wang, S., He, K., Jiang, M. and Li, F. (2017). Large-scale analysis reveals that the genome features of  
766 simple sequence repeats are generally conserved at the family level in insects. *BMC Genomics*, 18(1).  
767 doi:<https://doi.org/10.1186/s12864-017-4234-0>.
- 768 Dumetier, B., Sauter, C., Hajmirza, A., Pernon, B., Aucagne, R., Fournier, C., Row, C., Guidez, F., Rossi, C., Lepage,  
769 C., Delva, L. and Callanan, M.B. (2022). Repeat Element Activation-Driven Inflammation: Role of NFκB and  
770 Implications in Normal Development and Cancer? *Biomedicines*, [online] 10(12), pp.3101–3101.  
771 doi:<https://doi.org/10.3390/biomedicines10123101>.
- 772 Euclides, V.L.V., Gastaldi, V.D., Feltrin, A.S., Hoffman, D.J., Gouveia, G., Cogo, H., Felipe-Silva, A., Vieira, R.P.,  
773 Miguel, E.C., Polanczyk, G.V., Chiesa, A., Fracolli, L., Matijasevich, A., Ferraro, A., Argeu, A., Maschietto, M. and  
774 Brentani, H.P. (2022). DNA methylation mediates a randomized controlled trial home-visiting intervention during  
775 pregnancy and the Bayley infant's cognitive scores at 12 months of age. *Journal of Developmental Origins of Health*  
776 *and Disease*, 13(5), pp.556–565. doi:<https://doi.org/10.1017/S2040174421000738>.
- 777 Evans, T.A. and Erwin, J.A. (2021). Retroelement-derived RNA and its role in the brain. *Seminars in cell &*  
778 *developmental biology*, 114, pp.68–80. doi:<https://doi.org/10.1016/j.semcd.2020.11.001>.
- 779 Ewels, P., Magnusson, M., Lundin, S. and Källér, M. (2016). MultiQC: summarize analysis results for multiple tools  
780 and samples in a single report. *Bioinformatics*, 32(19), pp.3047–3048.  
781 doi:<https://doi.org/10.1093/bioinformatics/btw354>.
- 782 Feltrin, A.S., Tahira, A.C., Simões, S.N., Brentani, H. and Martins, D. (2019). Assessment of complementarity of  
783 WGCNA and NER1 results for identification of modules associated to schizophrenia spectrum disorders. *PLOS ONE*,  
784 14(1), pp.e0210431–e0210431. doi:<https://doi.org/10.1371/journal.pone.0210431>.
- 785 Frost, B., Hemberg, M., Lewis, J. and Feany, M.B. (2014). Tau promotes neurodegeneration through global  
786 chromatin relaxation. *Nature Neuroscience*, 17(3), pp.357–366. doi:<https://doi.org/10.1038/nn.3639>.
- 787 Gorbunova, V., Seluanov, A., Mita, P., McKerrow, W., Fenyö, D., Boeke, J. D., Linker, S. B., Gage, F. H., Kreiling, J.  
788 A., Petrashen, A. P., Woodham, T. A., Taylor, J. R., Helfand, S. L., & Sedivy, J. M. (2021). The role of  
789 retrotransposable elements in ageing and age-associated diseases. *Nature*, 596(7870), 43–53.
- 790 Guerreiro, R. and Bras, J. (2015). The age factor in Alzheimer's disease. *Genome Medicine*, [online] 7(1), pp.1–3.  
791 doi:<https://doi.org/10.1186/s13073-015-0232-5>.
- 792 Guo, C., Jeong, H.-H., Hsieh, Y.-C., Klein, H.-U., Bennett, D.A., De Jager, P.L., Liu, Z. and Shulman, J.M. (2018).  
793 Tau Activates Transposable Elements in Alzheimer's Disease. *Cell Reports*, 23(10), pp.2874–2880.  
794 doi:<https://doi.org/10.1016/j.celrep.2018.05.004>.

- 795 Ham, S. and Lee, S.-J.V. (2020). Advances in transcriptome analysis of human brain aging. *Experimental &*  
796 *Molecular Medicine*, [online] 52(11), pp.1787–1797. doi:<https://doi.org/10.1038/s12276-020-00522-6>.
- 797 Hanna, R., Flamier, A., Barabino, A., & Bernier, G. (2021). G-quadruplexes originating from evolutionary conserved  
798 L1 elements interfere with neuronal gene expression in Alzheimer’s disease. *Nature Communications*, 12(1).  
799
- 800 Jaffe, A.E., Straub, R.E., Shin, J.H., Tao, R., Gao, Y., Collado-Torres, L., Kam-Thong, T., Xi, H.S., Quan, J., Chen,  
801 Q., Colantuoni, C., Ulrich, W.S., Maher, B.J., Deep-Soboslay, A., BrainSeq Consortium, Cross, A.J., Brandon, N.J.,  
802 Leek, J.T., Hyde, T.M. and Kleinman, J.E. (2018). Developmental and genetic regulation of the human cortex  
803 transcriptome illuminate schizophrenia pathogenesis. *Nature Neuroscience*, [online] 21(8), pp.1117–1125.  
804 doi:<https://doi.org/10.1038/s41593-018-0197-y>.
- 805
- 806 Jin, X., Xu, X.-E., Jiang, Y.-Z., Liu, Y.-R., Sun, W., Guo, Y.-J., Ren, Y.-X., Zuo, W.-J., Hu, X., Huang, S.-L., Shen, H.-  
807 J., Lan, F., He, Y.-F., Hu, G.-H., Di, G.-H., He, X.-H., Li, D.-Q., Liu, S., Yu, K.-D., & Shao, Z.-M. (2019). The  
808 endogenous retrovirus-derived long noncoding RNA TROJAN promotes triple-negative breast cancer progression via  
809 ZMYND8 degradation. *Science Advances*, 5(3), doi:10.1126/sciadv.aat9820
- 810
- 811 Jin, Y., Tam, O.H., Paniagua, E. and Hammell, M. (2015). TEtranscripts: a package for including transposable  
812 elements in differential expression analysis of RNA-seq datasets. *Bioinformatics*, 31(22), pp.3593–3599.  
813 doi:<https://doi.org/10.1093/bioinformatics/btv422>.
- 814 Kim, D., Paggi, J.M., Park, C., Bennett, C. and Salzberg, S.L. (2019). Graph-based genome alignment and  
815 genotyping with HISAT2 and HISAT-genotype. *Nature Biotechnology*, 37(8), pp.907–915.  
816 doi:<https://doi.org/10.1038/s41587-019-0201-4>.
- 817
- 818 Klopfenstein, D.V., Zhang, L., Pedersen, B.S., Ramírez, F., Warwick Vesztröcy, A., Naldi, A., Mungall, C.J., Yunes,  
819 J.M., Botvinnik, O., Weigel, M., Dampier, W., Dessimoz, C., Flick, P. and Tang, H. (2018). GOATOOLS: A Python  
820 library for Gene Ontology analyses. *Scientific Reports*, 8(1). doi:<https://doi.org/10.1038/s41598-018-28948-z>.
- 821 Kmetzsch, V., Anquetil, V., Saracino, D., Rinaldi, D., Camuzat, A., Gareau, T., Jornéa, L., Forlani, S., Couratier, P.,  
822 Wallon, D., Pasquier, F., Robil, N., De La Grange, P., Moszer, I., Le Ber, I., Colliot, O., & Becker, E. (2020). Plasma  
823 microRNA signature in presymptomatic and symptomatic subjects with *C9orf72*-associated frontotemporal dementia  
824 and amyotrophic lateral sclerosis. *Journal of Neurology, Neurosurgery, and Psychiatry*, 92(5), 485–493.  
825
- 826 Langfelder, P. and Horvath, S. (2008). WGCNA: an R package for weighted correlation network analysis. *BMC*  
827 *Bioinformatics*, [online] 9(1). doi:<https://doi.org/10.1186/1471-2105-9-559>.
- 828 LaRocca, T.J., Cavalier, A.N. and Wahl, D. (2020). Repetitive elements as a transcriptomic marker of aging:  
829 Evidence in multiple datasets and models. *Ageing Cell*, [online] 19(7), p.e13167.  
830 doi:<https://doi.org/10.1111/accel.13167>.

- 831 Laufer, G., Mayer, J., Mueller, B.F., Mueller-Lantzsch, N. and Ruprecht, K. (2009). Analysis of transcribed human  
832 endogenous retrovirus W env loci clarifies the origin of multiple sclerosis-associated retrovirus env sequences.  
833 *Retrovirology*, 6(1), p.37. doi:<https://doi.org/10.1186/1742-4690-6-37>.
- 834 Law, C.W., Chen, Y., Shi, W. and Smyth, G.K. (2014). voom: precision weights unlock linear model analysis tools for  
835 RNA-seq read counts. *Genome Biology*, 15(2), p.R29. doi:<https://doi.org/10.1186/gb-2014-15-2-r29>.
- 836 Lee, E., Iskow, R., Yang, L., Gokcumen, O., Haseley, P., Luquette, L. J., Lohr, J. G., Harris, C. C., Ding, L., Wilson,  
837 R. K., Wheeler, D. A., Gibbs, R. A., Kucherlapati, R., Lee, C., Kharchenko, P. V., & Park, P. J. (2012). Landscape of  
838 Somatic Retrotransposition in Human Cancers. *Science*, 337(6097), 967–971.  
839
- 840 Leek, J.T., Johnson, W.E., Parker, H.S., Jaffe, A.E. and Storey, J.D. (2012). The sva package for removing batch  
841 effects and other unwanted variation in high-throughput experiments. *Bioinformatics*, [online] 28(6), pp.882–883.  
842 doi:<https://doi.org/10.1093/bioinformatics/bts034>.
- 843 Li, W., Prazak, L., Chatterjee, N., Grüninger, S., Krug, L., Theodorou, D., & Dubnau, J. (2013). Activation of  
844 transposable elements during aging and neuronal decline in *Drosophila*. *Nature Neuroscience*, 16(5), 529–531.  
845
- 846 Liao, Y., Smyth, G.K. and Shi, W. (2014). featureCounts: an efficient general purpose program for assigning  
847 sequence reads to genomic features. *Bioinformatics*, 30(7), pp.923–930.  
848 doi:<https://doi.org/10.1093/bioinformatics/btt656>.
- 849 Liu, S., Heumüller, S.-E., Hossinger, A., Müller, S.A., Buravlova, O., Lichtenthaler, S.F., Denner, P. and Vorberg, I.M.  
850 (2023). Reactivated endogenous retroviruses promote protein aggregate spreading. *Nature Communications*, [online]  
851 14(1), p.5034. doi:<https://doi.org/10.1038/s41467-023-40632-z>.
- 852 López-Otín, C., Blasco, M.A., Partridge, L., Serrano, M. and Kroemer, G. (2013). The Hallmarks of Aging. *Cell*,  
853 153(6), pp.1194–1217. doi:<https://doi.org/10.1016/j.cell.2013.05.039>.
- 854 Macías-Redondo, S., Strunk, M., Cebollada-Solanas, A., Ara, J.-R., Jesús Martín, J. and Schoorlemmer, J. (2021).  
855 Upregulation of selected HERVW loci in multiple sclerosis. *Mobile DNA*, 12(1). doi:<https://doi.org/10.1186/s13100-021-00243-1>.  
856
- 857 McCarthy, D.J., Chen, Y. and Smyth, G.K. (2012). Differential expression analysis of multifactor RNA-Seq  
858 experiments with respect to biological variation. *Nucleic Acids Research*, 40(10), pp.4288–4297.  
859 doi:<https://doi.org/10.1093/nar/gks042>.
- 860 Parsana, P., Ruberman, C., Jaffe, A.E., Schatz, M.C., Battle, A. and Leek, J.T. (2019). Addressing confounding  
861 artifacts in reconstruction of gene co-expression networks. *Genome Biology*, [online] 20(1).  
862 doi:<https://doi.org/10.1186/s13059-019-1700-9>.



- 863 Pascut, D., Pratama, M.Y., Gilardi, F., Giuffrè, M., Crocè, L.S. and Tiribelli, C. (2020). Weighted miRNA co-  
864 expression networks analysis identifies circulating miRNA predicting overall survival in hepatocellular carcinoma  
865 patients. *Scientific Reports*, 10(1). doi:<https://doi.org/10.1038/s41598-020-75945-2>.
- 866 Pedregosa, F., Varoquaux, G., Gramfort, A., Michel, V., Thirion, B., Grisel, O., Blondel, M., Louppe, G., Prettenhofer,  
867 P., Weiss, R., Weiss, R.J., Vanderplas, J., Passos, A., Cournapeau, D., Brucher, M., Perrot, M. and Duchesnay, E.  
868 (2011). Scikit-learn: Machine Learning in Python. *J. Mach. Learn. Res.*, [online] 12.  
869 doi:<https://doi.org/10.5555/1953048.2078195>.
- 870 Petersen, M., Armisén, D., Gibbs, R.A., Hering, L., Khila, A., Mayer, G., Richards, S., Niehuis, O. and Misof, B.  
871 (2019). Diversity and evolution of the transposable element repertoire in arthropods with particular reference to  
872 insects. *BMC Ecology and Evolution*, 19(1). doi:<https://doi.org/10.1186/s12862-018-1324-9>.
- 873 Ritchie, M.E., Phipson, B., Wu, D., Hu, Y., Law, C.W., Shi, W. and Smyth, G.K. (2019). limma powers differential  
874 expression analyses for RNA-sequencing and microarray studies. *Nucleic Acids Research*, 43(7), pp.e47–e47.  
875 doi:<https://doi.org/10.1093/nar/gkv007>.
- 876 Robinson, M.D., McCarthy, D.J. and Smyth, G.K. (2009). edgeR: a Bioconductor package for differential expression  
877 analysis of digital gene expression data. *Bioinformatics*, 26(1), pp.139–140.  
878 doi:<https://doi.org/10.1093/bioinformatics/btp616>.
- 879 Sahakyan, A. B., Murat, P., Mayer, C., & Balasubramanian, S. (2017). G-quadruplex structures within the 3' UTR of  
880 LINE-1 elements stimulate retrotransposition. *Nature Structural & Molecular Biology*, 24(3), 243–247.  
881
- 882 Schmitt, K., Richter, C., Backes, C., Meese, E., Ruprecht, K. and Mayer, J. (2013). Comprehensive Analysis of  
883 Human Endogenous Retrovirus Group HERV-W Locus Transcription in Multiple Sclerosis Brain Lesions by High-  
884 Throughput Amplicon Sequencing. *Journal of Virology*, 87(24), pp.13837–13852.  
885 doi:<https://doi.org/10.1128/jvi.02388-13>.
- 886 Schrader, L., & Schmitz, J. (2018). The impact of transposable elements in adaptive evolution. *Molecular Ecology*,  
887 28(6), 1537–1549.  
888
- 889 Schubert, C., O'Donnell, P., Quan, J., Wendland, J.R., Xi, H.S., Winslow, A.R., Domenici, E., Essioux, L., Kam-  
890 Thong, T., Airey, D., Calley, J.N., Collier, D.A., Wang, H., Eastwood, B.J., Ebert, P.A., Liu, Y., Nisenbaum, L., Ruble,  
891 C.L., Scherschel, J.E. and Smith, R. (2015). BrainSeq: Neurogenomics to Drive Novel Target Discovery for  
892 Neuropsychiatric Disorders. *Neuron*, 88(6), pp.1078–1083. doi:<https://doi.org/10.1016/j.neuron.2015.10.047>.
- 893 Simon, M., Van Meter, M., Ablava, J., Ke, Z., Gonzalez, R.S., Taguchi, T., De Cecco, M., Leonova, K.I., Kogan, V.,  
894 Helfand, S.L., Neretti, N., Roichman, A., Cohen, H.Y., Meer, M.V., Gladyshev, V.N., Antoch, M.P., Gudkov, A.V.,  
895 Sedivy, J.M., Seluanov, A. and Gorbunova, V. (2019). LINE1 Derepression in Aged Wild-Type and SIRT6-Deficient  
896 Mice Drives Inflammation. *Cell metabolism*, [online] 29(4), pp.871-885.e5.  
897 doi:<https://doi.org/10.1016/j.cmet.2019.02.014>.

- 898 Smyth, G. and Hall, E. (2009). Linear Models and Empirical Bayes Methods for Assessing Differential Expression in  
899 Microarray Experiments. *Statistical Applications in Genetics and Molecular Biology*, [online] 3(1). Turelli, P., Playfoot,  
900 C., Grun, D., Raclot, C., Pontis, J., Coudray, A., Thorball, C., Duc, J., Pankevich, E.V., Deplancke, B., Busskamp, V.  
901 and Trono, D. (2020). Primate-restricted KRAB zinc finger proteins and target retrotransposons control gene  
902 expression in human neurons. *Science Advances*, 6(35), p.eaba3200. doi:<https://doi.org/10.1126/sciadv.aba3200>.
- 903 Wang, L., Wang, S. and Li, W. (2012). RSeQC: quality control of RNA-seq experiments. *Bioinformatics*, 28(16),  
904 pp.2184–2185. doi:<https://doi.org/10.1093/bioinformatics/bts356>.
- 905 Wang, M., Zhao, Y. and Zhang, B. (2015). Efficient Test and Visualization of Multi-Set Intersections. *Scientific*  
906 *Reports*, [online] 5(1). doi:<https://doi.org/10.1038/srep16923>.
- 907 Yamamoto, R., Chung, R., Vazquez, J.M., Sheng, H., Steinberg, P.L., Ioannidis, N.M. and Sudmant, P.H. (2022).  
908 Tissue-specific impacts of aging and genetics on gene expression patterns in humans. *Nature Communications*,  
909 [online] 13(1), p.5803. doi:<https://doi.org/10.1038/s41467-022-33509-0>.
- 910

**A.**

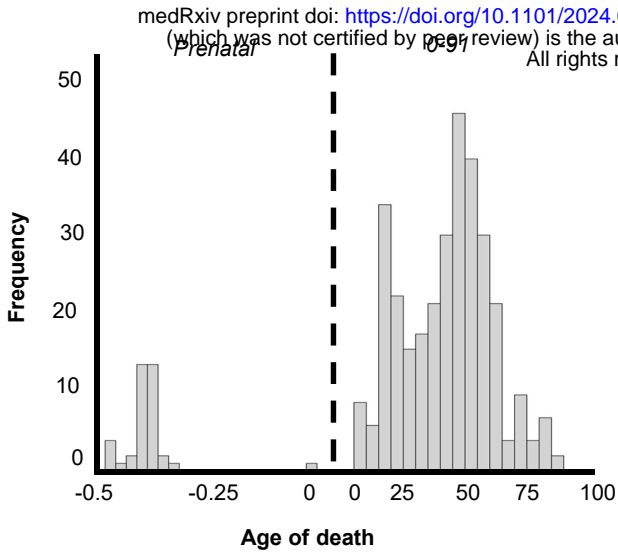

**B.**

|          | Caudate Nucleus | DLPFC  | Hippocampus |
|----------|-----------------|--------|-------------|
| Samples  | n=271           | n= 304 | n= 310      |
| Prenatal | N/A             | 25     | 25          |
| 0-15     | 27              | 40     | 37          |
| 16-29    | 41              | 52     | 57          |
| 30-39    | 30              | 29     | 37          |
| 40-49    | 68              | 62     | 66          |
| 50-59    | 58              | 52     | 58          |
| 60+      | 44              | 27     | 26          |

**C.**

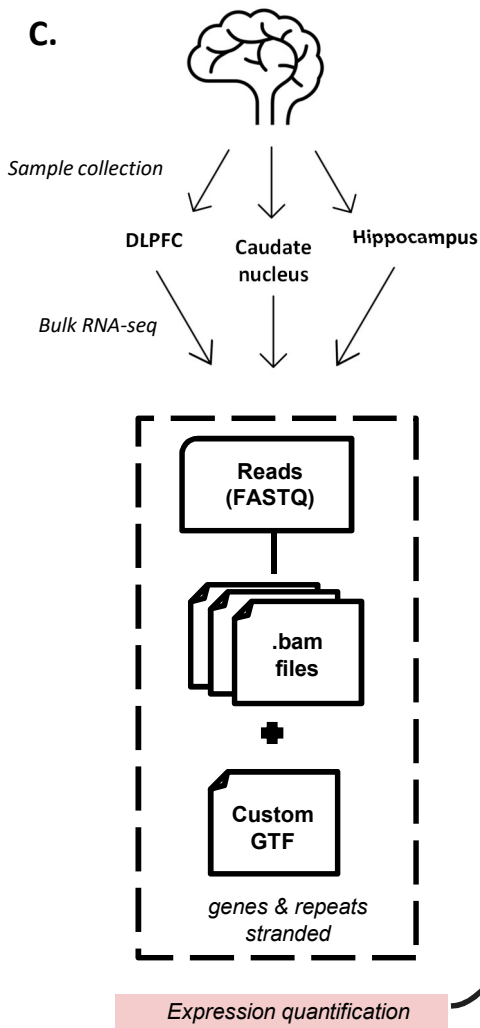

**D.**

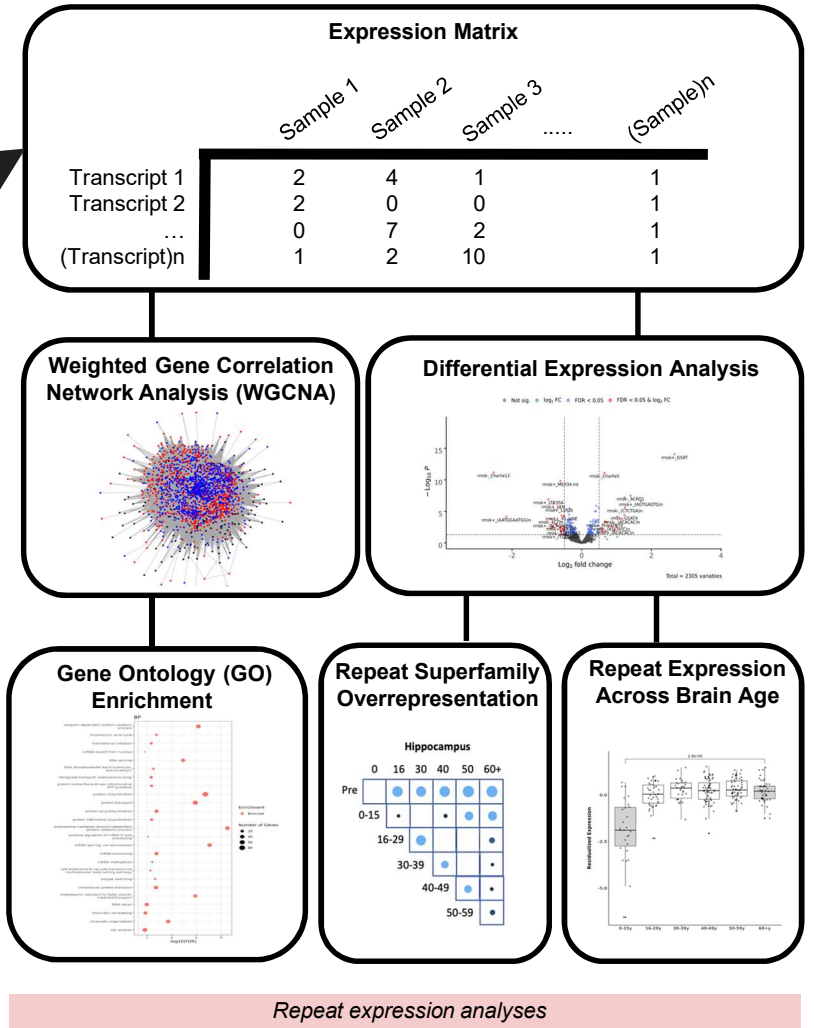

medRxiv preprint doi: <https://doi.org/10.1101/2024.05.17.24307184>; this version posted May 17, 2024. The copyright holder for this preprint (which was not certified by peer review) is the author/funder, who has granted medRxiv a license to display the preprint in perpetuity. All rights reserved. No reuse allowed without permission.

**A.**

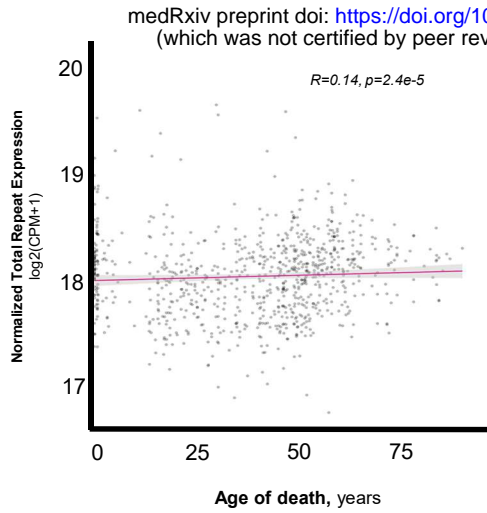

**B.**

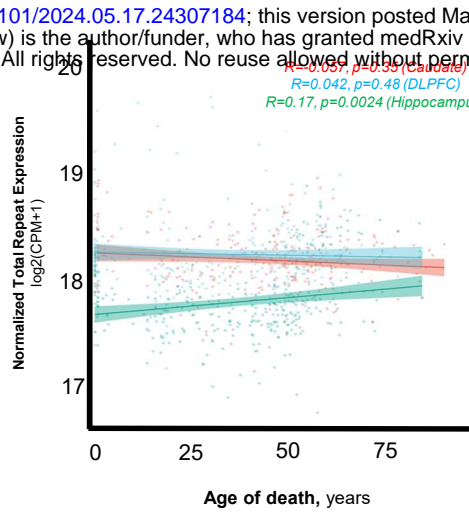

**C.**

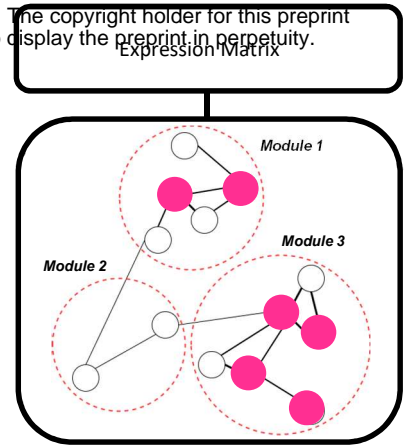

**D.**

**Caudate nucleus**  
16 modules

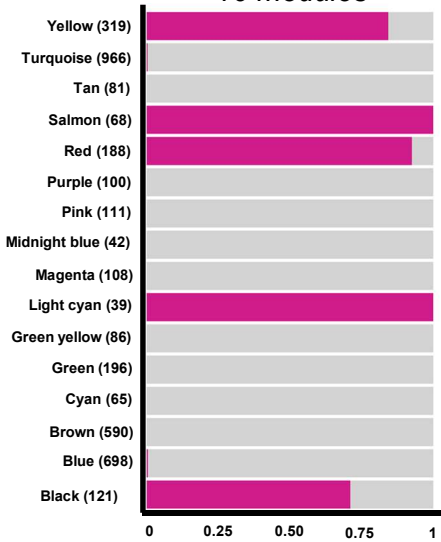

**DLPFC**  
14 modules

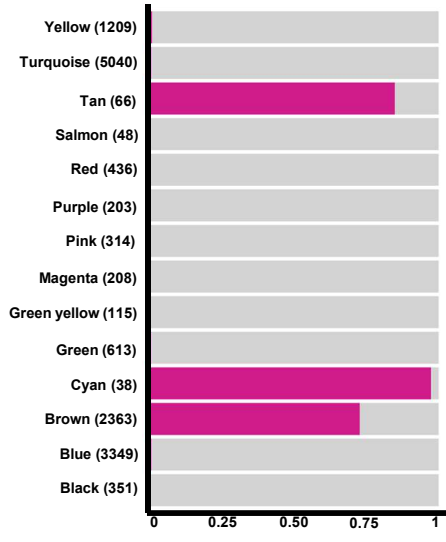

**Hippocampus**  
13 modules

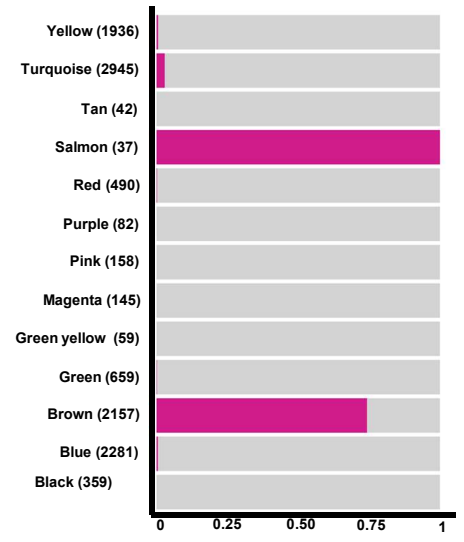

**E.**

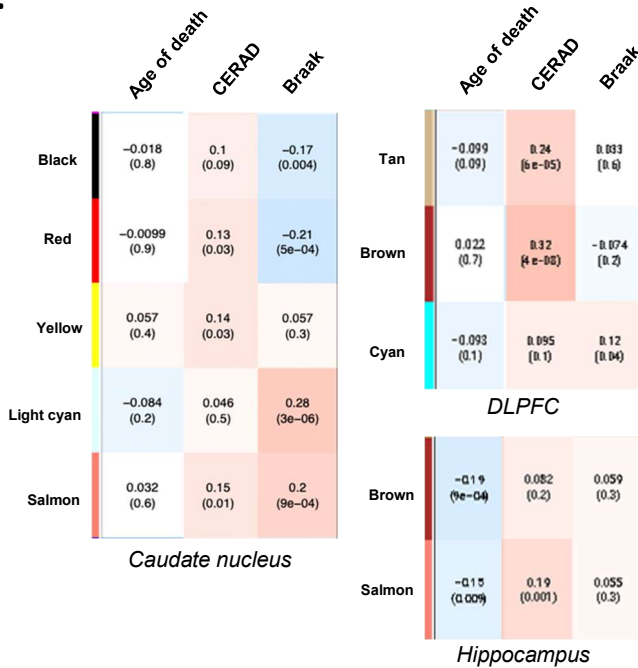

**F.**

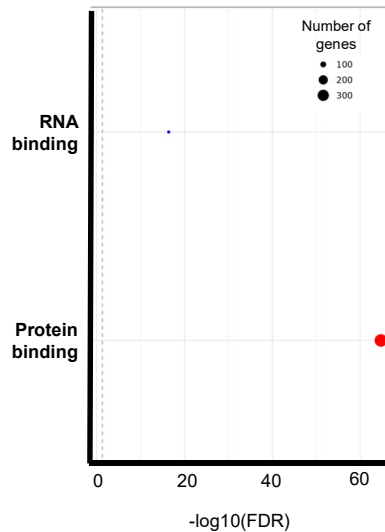

**G.**

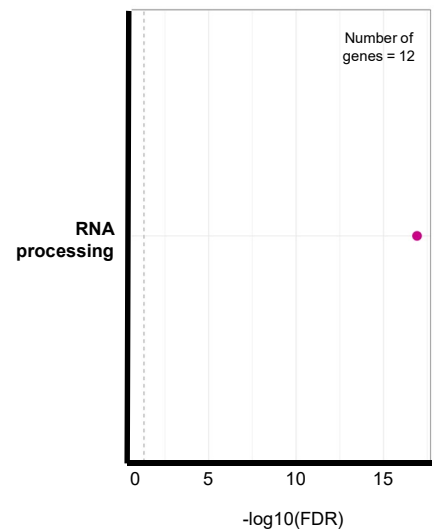



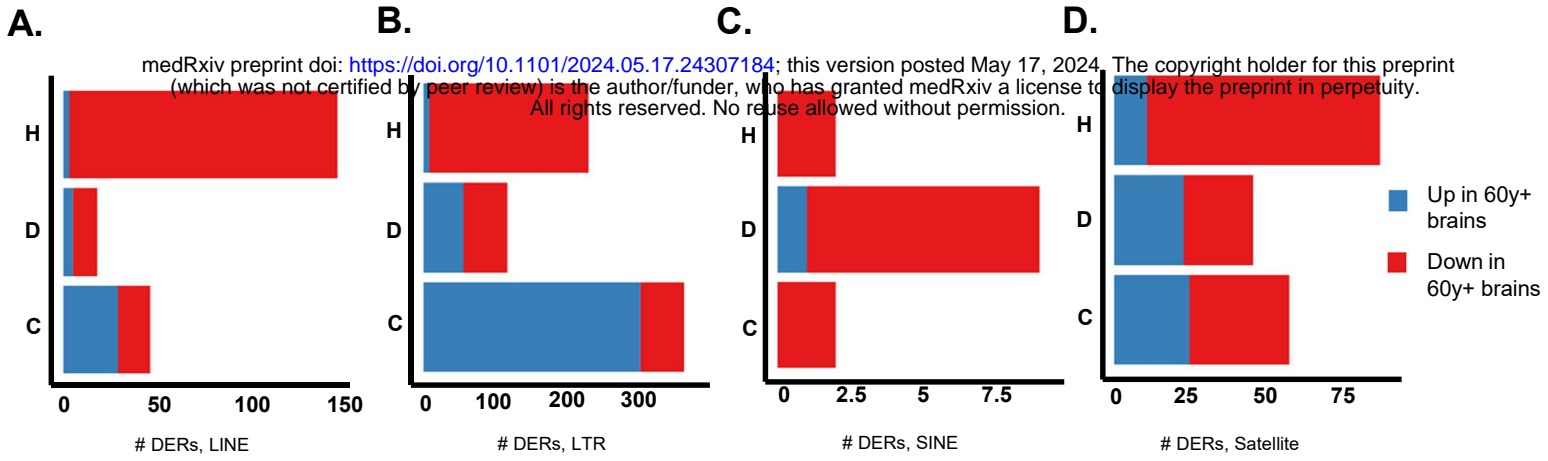

## E. LINE

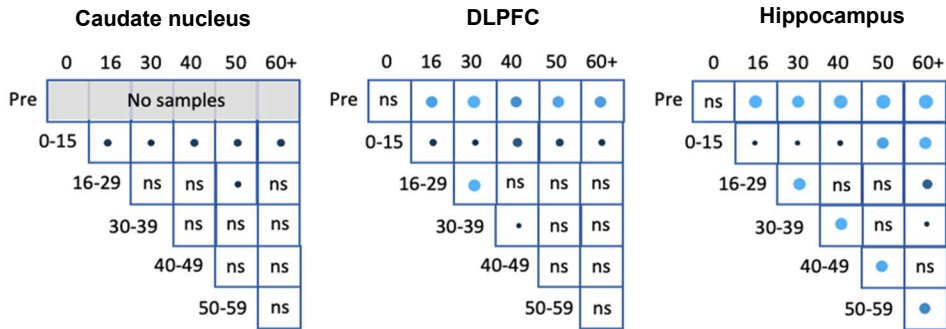

## F. LTR

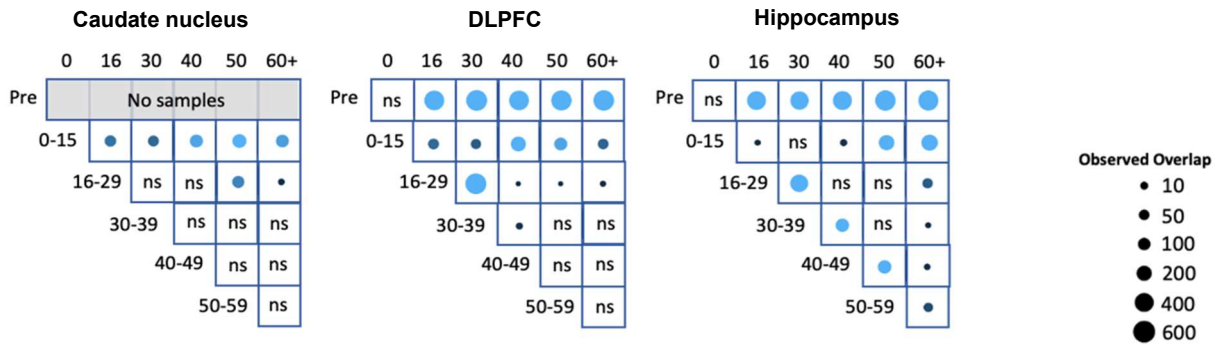

## G. SINE

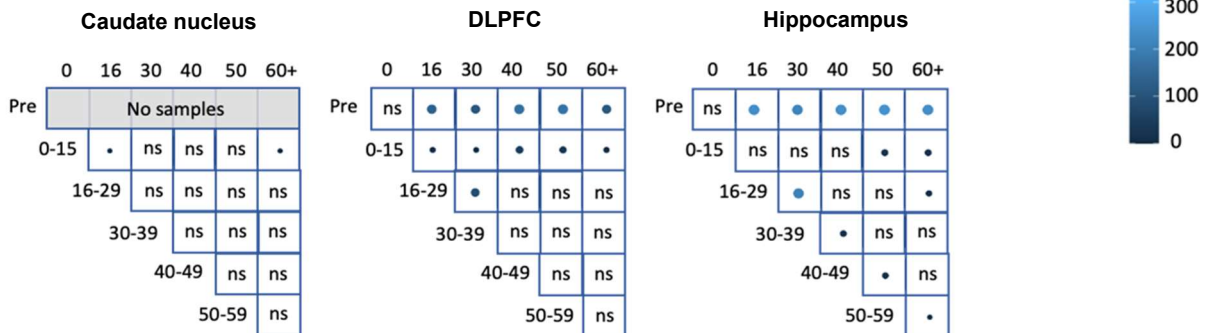

## H. Satellite

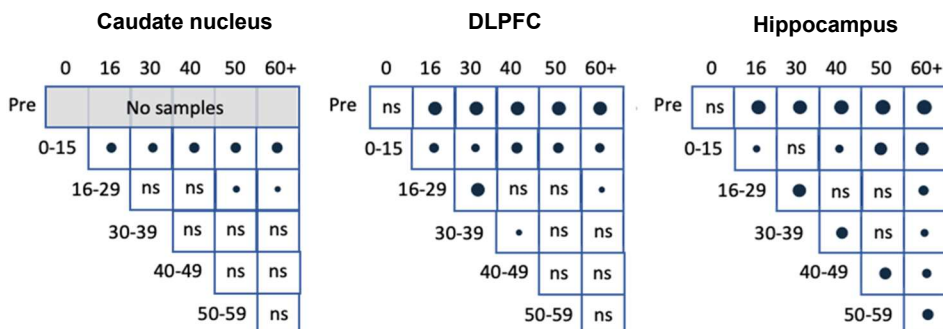

A.

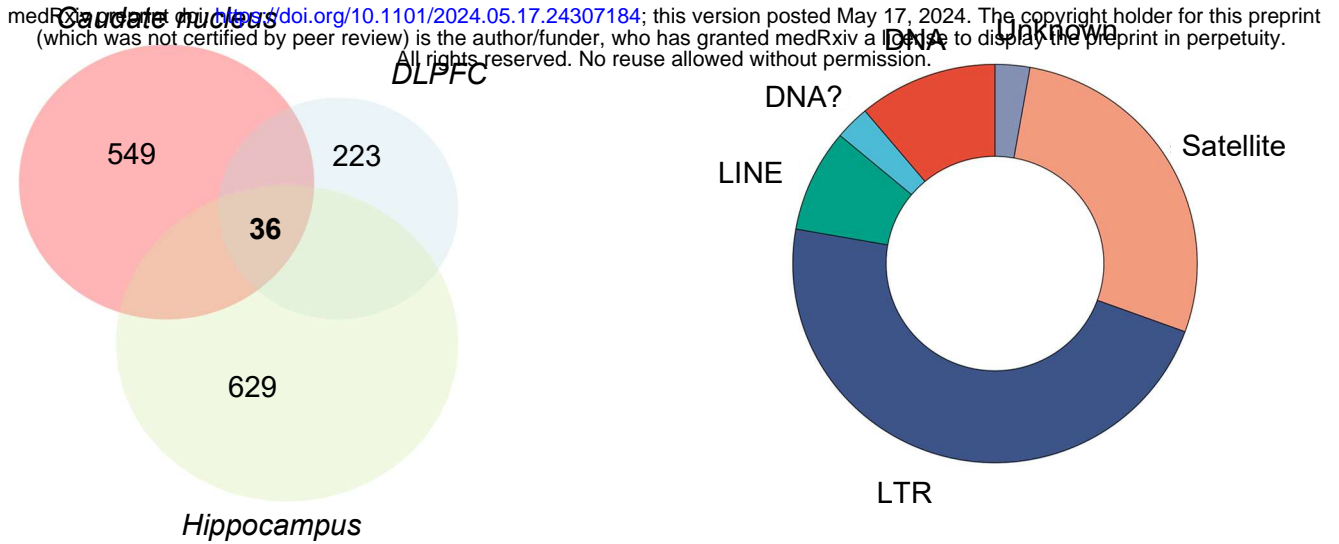

B.

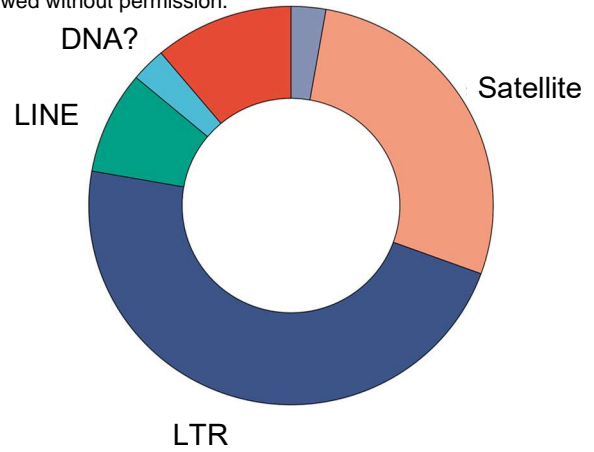

C.

| Repeat      | Strand | Repeat Class | FDR, Caudate | FDR, DLPPFC | FDR, Hippo |
|-------------|--------|--------------|--------------|-------------|------------|
| MER4D0      | -      | LTR          | 0.042        | 0.02        | 0.012      |
| MLT1G-int   | +      | LTR          | 1.24E-06     | 4.80E-05    | 0.0001     |
| MER84-int   | -      | LTR          | 7.11E-08     | 0.00024     | 8.70E-05   |
| MLT1F1-int  | +      | LTR          | 1.95E-06     | 3.20E-05    | 0.0024     |
| MamGypLTR2c | +      | LTR          | 2.29E-10     | 0.0002      | 0.00076    |
| HERVK-int   | +      | LTR          | 0.011        | 0.043       | 0.00026    |
| MLT1E3-int  | -      | LTR          | 0.0059       | 0.029       | 0.0029     |
| LTR57-int   | -      | LTR          | 0.03         | 1.37E-06    | 0.0035     |
| MER66-int   | -      | LTR          | 0.015        | 0.032       | 0.0025     |
| MLT1F2-int  | -      | LTR          | 0.00035      | 0.022       | 0.0051     |
| LTR12B      | +      | LTR          | 0.00034      | 0.00057     | 0.00067    |
| MER101      | +      | LTR          | 0.0015       | 0.0075      | 0.0037     |
| LTR45       | -      | LTR          | 0.0028       | 0.00055     | 0.0028     |
| MERS7C1     | +      | LTR          | 0.0027       | 0.0094      | 0.036      |
| LTR2752     | -      | LTR          | 0.0014       | 0.00066     | 0.00014    |
| MER61F      | +      | LTR          | 0.0011       | 0.00057     | 0.0019     |
| HERV9NC-int | +      | LTR          | 0.0011       | 0.0044      | 0.01       |

D.

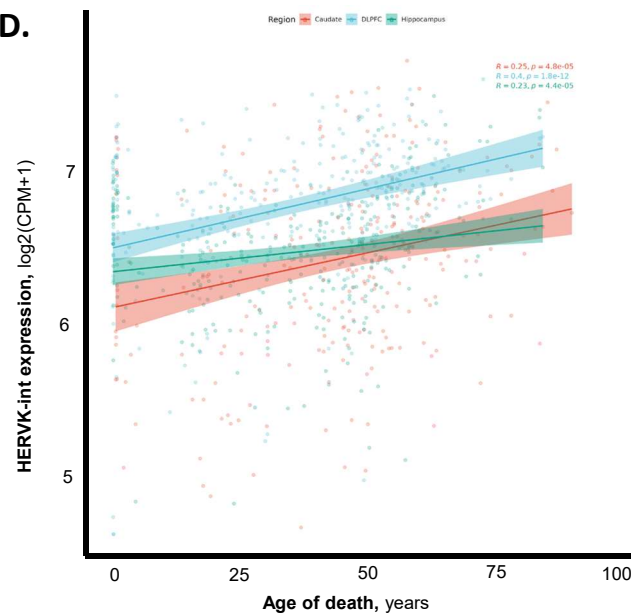

E.

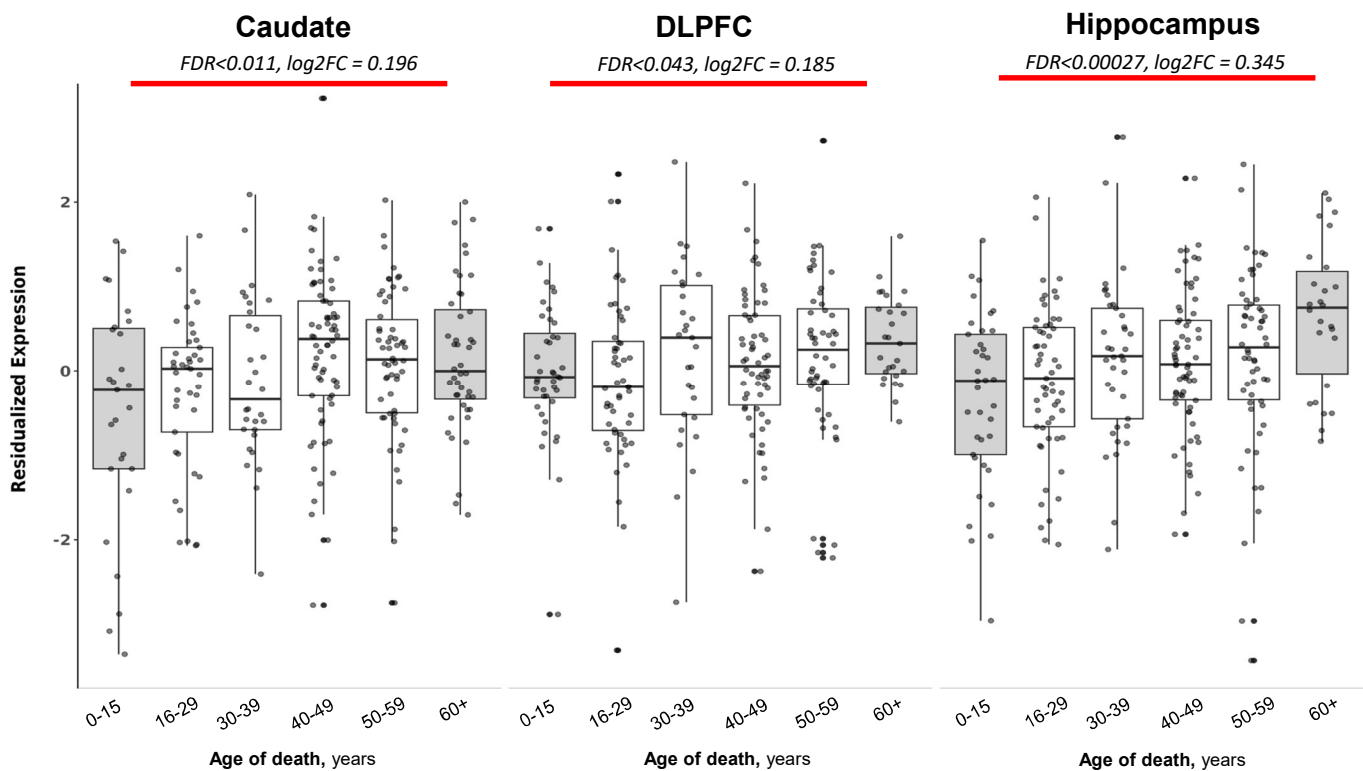

**A.**

medRxiv preprint doi: <https://doi.org/10.1101/2024.05.17.24307184>; this version posted May 17, 2024. The copyright holder for this preprint (which was not certified by peer review) is the author/funder, who has granted medRxiv a license to display the preprint in perpetuity. All rights reserved. No reuse allowed without permission.

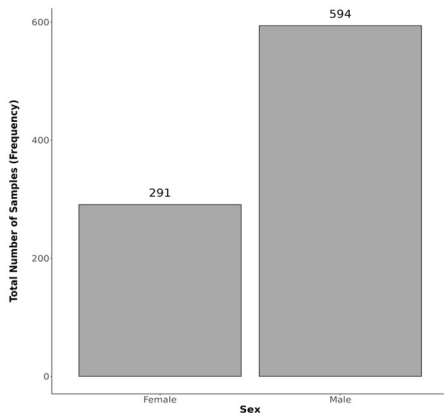**B.**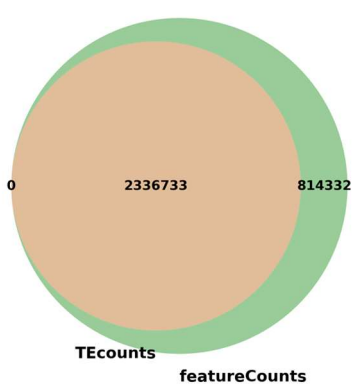**C.**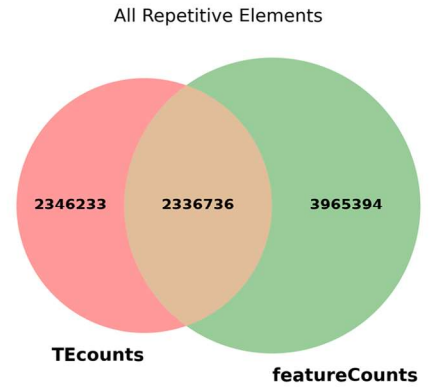**D. TEcounts**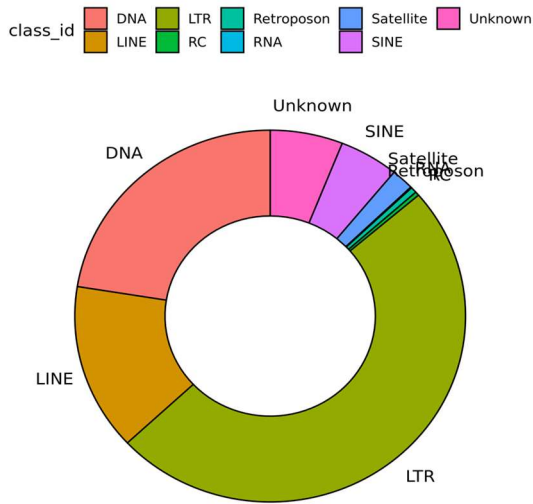**E. featureCounts**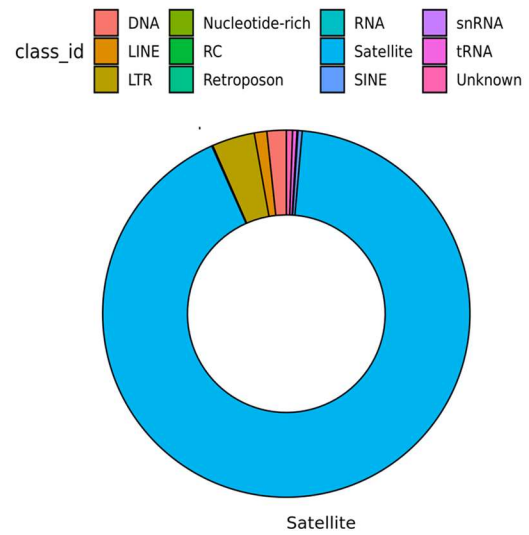**F.**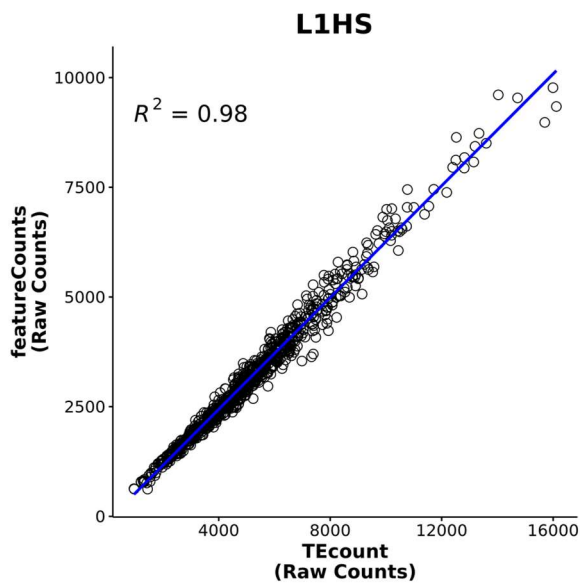**G.**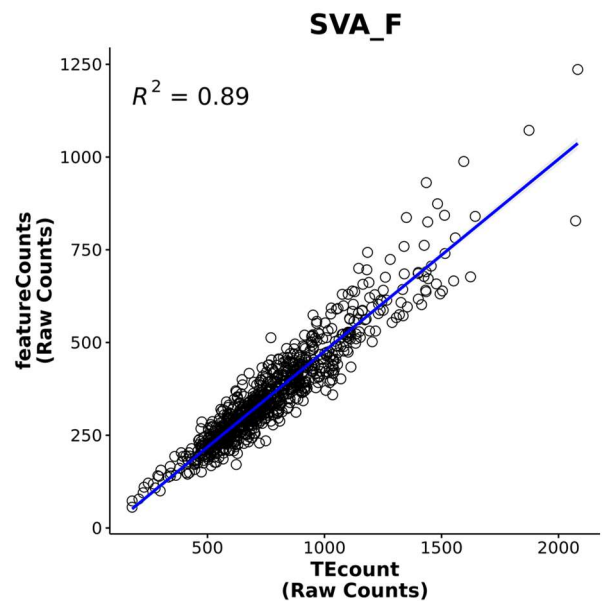



|             | Age of death     | RNA integrity   | pH              | PMI            | Mito rate       | Alignment rate  | African ancestry | European ancestry | Male            | Female         | CERAD          | Braak            |
|-------------|------------------|-----------------|-----------------|----------------|-----------------|-----------------|------------------|-------------------|-----------------|----------------|----------------|------------------|
| MEblack     | -0.018<br>(0.8)  | -0.0024<br>(1)  | 0.13<br>(0.03)  | 0.054<br>(0.4) | 0.0019<br>(1)   | 0.007<br>(0.9)  | 0.00063<br>(1)   | -0.00063<br>(1)   | -0.0026<br>(1)  | 0.0026<br>(1)  | 0.1<br>(0.09)  | -0.17<br>(0.004) |
| MEred       | -0.0099<br>(0.9) | -0.023<br>(0.7) | 0.11<br>(0.06)  | 0.045<br>(0.5) | 0.0013<br>(1)   | -0.021<br>(0.7) | -0.002<br>(1)    | 0.002<br>(1)      | -8.3e-05<br>(1) | 8.3e-05<br>(1) | 0.13<br>(0.03) | -0.21<br>(5e-04) |
| MEyellow    | 0.057<br>(0.4)   | -0.012<br>(0.8) | -0.034<br>(0.6) | -0.0022<br>(1) | -0.00038<br>(1) | -0.0031<br>(1)  | -0.0063<br>(0.9) | 0.0063<br>(0.9)   | 0.0032<br>(1)   | -0.0032<br>(1) | 0.14<br>(0.03) | 0.057<br>(0.3)   |
| MElightcyan | -0.084<br>(0.2)  | -0.001<br>(1)   | 0.087<br>(0.2)  | 0.028<br>(0.7) | 0.00016<br>(1)  | 0.0036<br>(1)   | 0.00062<br>(1)   | -0.00062<br>(1)   | -0.00056<br>(1) | 0.00056<br>(1) | 0.046<br>(0.5) | 0.28<br>(3e-06)  |
| MEsalmon    | 0.032<br>(0.6)   | -8e-04<br>(1)   | 0.083<br>(0.2)  | 0.0013<br>(1)  | -5.4e-06<br>(1) | 0.0058<br>(0.9) | 7e-04<br>(1)     | -7e-04<br>(1)     | -0.0015<br>(1)  | 0.0015<br>(1)  | 0.15<br>(0.01) | 0.2<br>(9e-04)   |

## B. DLPFC

|          | Age of death     | RNA integrity    | pH               | PMI             | Mito rate       | Alignment rate  | African ancestry | European ancestry | Male             | Female          | Prenatal         | CERAD           | Braak           |
|----------|------------------|------------------|------------------|-----------------|-----------------|-----------------|------------------|-------------------|------------------|-----------------|------------------|-----------------|-----------------|
| MEtan    | -0.099<br>(0.09) | -0.0069<br>(0.9) | -0.11<br>(0.07)  | -0.038<br>(0.5) | 0.019<br>(0.8)  | -0.11<br>(0.06) | 0.007<br>(0.9)   | -0.007<br>(0.9)   | -0.0071<br>(0.9) | 0.0071<br>(0.9) | 0.055<br>(0.4)   | 0.24<br>(6e-05) | 0.033<br>(0.6)  |
| MEbrown  | 0.022<br>(0.7)   | -0.0042<br>(0.9) | -0.13<br>(0.03)  | 0.12<br>(0.04)  | 0.039<br>(0.5)  | -0.11<br>(0.07) | 0.01<br>(0.9)    | -0.01<br>(0.9)    | -0.0088<br>(0.9) | 0.0088<br>(0.9) | -0.16<br>(0.006) | 0.32<br>(4e-08) | -0.074<br>(0.2) |
| MEcyan   | -0.093<br>(0.1)  | -4e-04<br>(1)    | -0.14<br>(0.02)  | 0.017<br>(0.8)  | 0.0085<br>(0.9) | -0.048<br>(0.4) | 0.0031<br>(1)    | -0.0031<br>(1)    | -0.006<br>(0.9)  | 0.006<br>(0.9)  | 0.016<br>(0.8)   | 0.095<br>(0.1)  | 0.12<br>(0.04)  |
| MEbrown  | -0.19<br>(9e-04) | -0.0095<br>(0.9) | -0.15<br>(0.007) | -0.054<br>(0.3) | 0.0021<br>(1)   | -0.043<br>(0.5) | -0.0066<br>(0.9) | 0.0066<br>(0.9)   | -0.00076<br>(1)  | 0.00076<br>(1)  | 0.16<br>(0.005)  | 0.082<br>(0.2)  | 0.059<br>(0.3)  |
| MEsalmon | -0.15<br>(0.009) | -0.0055<br>(0.9) | -0.15<br>(0.007) | -0.12<br>(0.04) | 0.0012<br>(1)   | -0.034<br>(0.6) | -0.00054<br>(1)  | 0.00054<br>(1)    | -0.002<br>(1)    | 0.002<br>(1)    | 0.25<br>(7e-06)  | 0.19<br>(0.001) | 0.055<br>(0.3)  |

## C. Hippocampus

### A. DLFC, blue

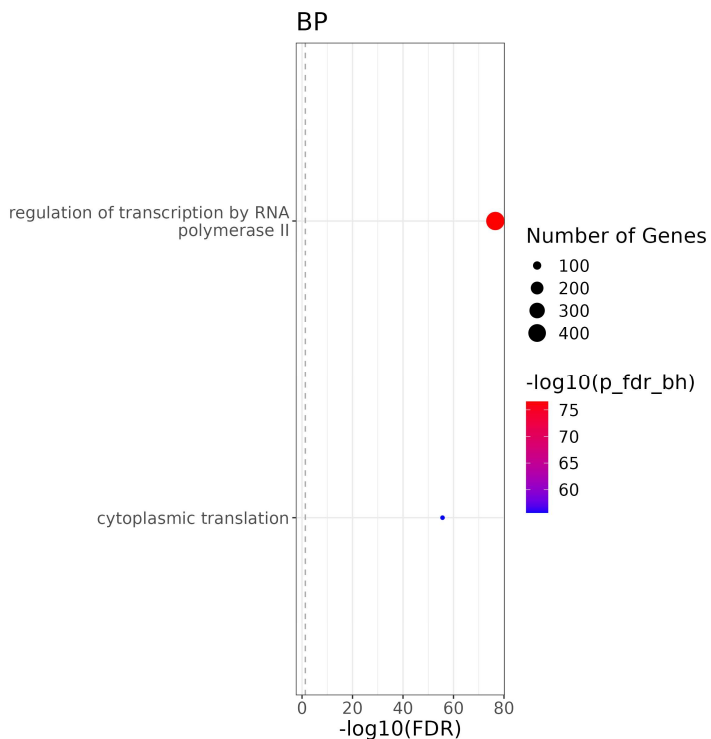

### B. Hippocampus, Yellow

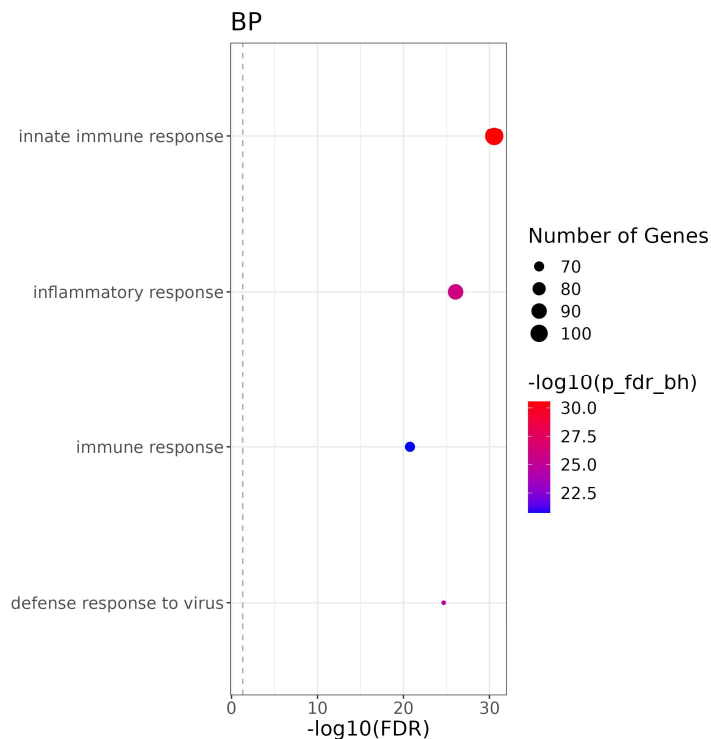

### C. Caudate nucleus, yellow

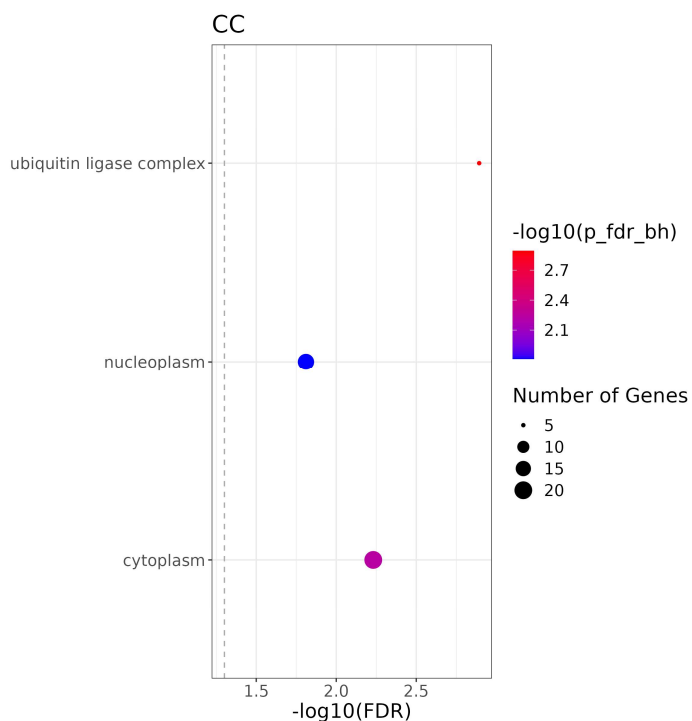

### D. Hippocampus, brown

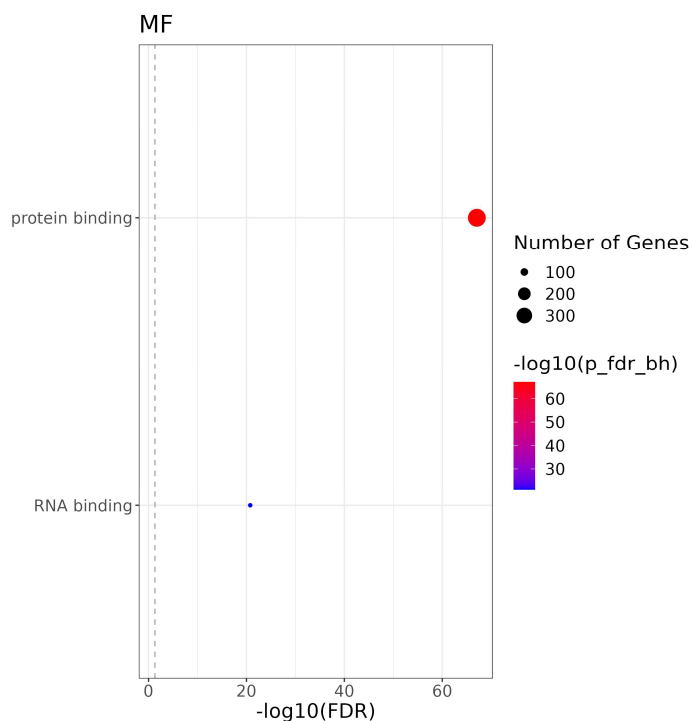

### A. Total, Differentially Expressed Repeats

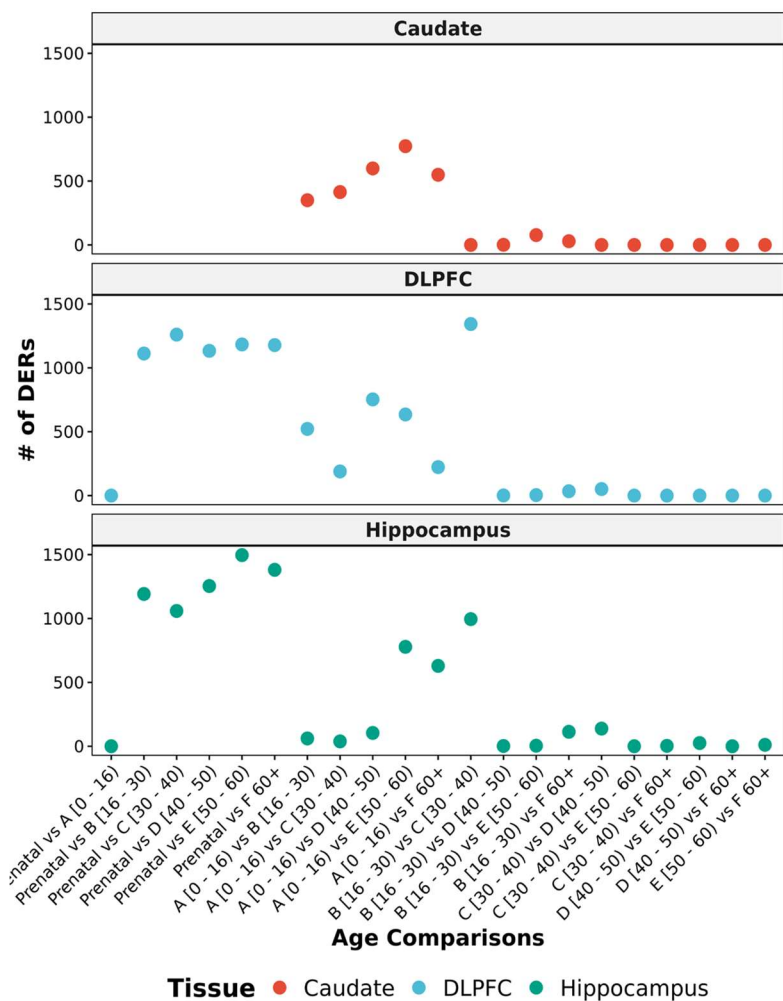

### B. DERs shared by tissue, 0-15 v. 60y+

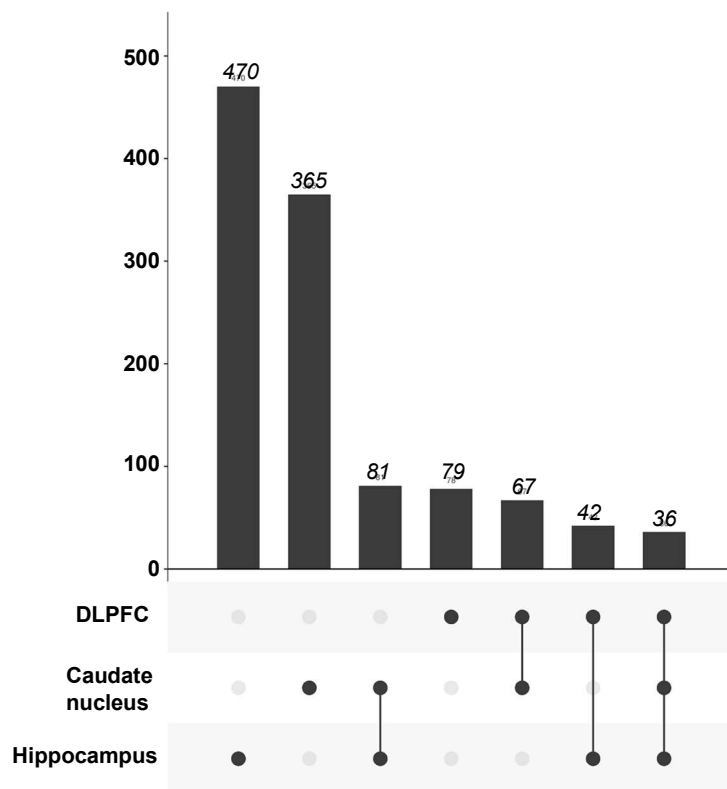



### A. Total repeat category expression, all regions

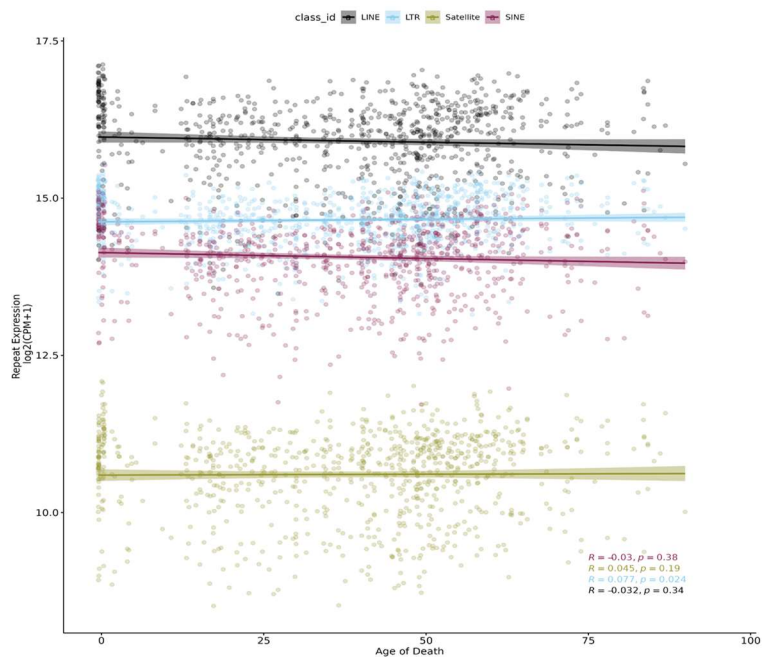

### B. HERVs, total expression, all regions

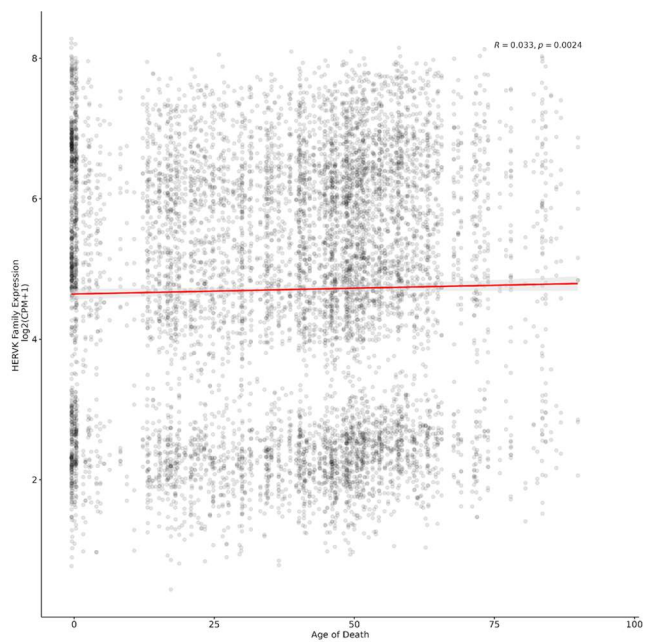

### C. HERVs, total expression, by brain region

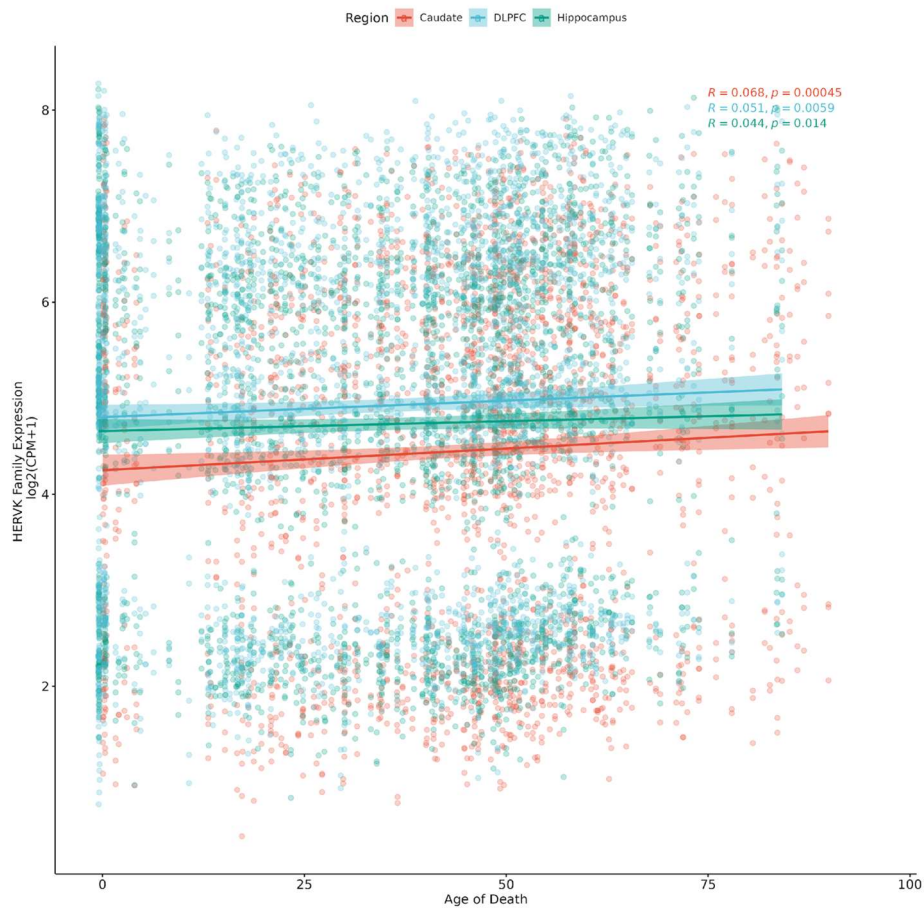

Source: https://medrxiv.org/content/10.1101/2024.05.17.24307184v1.full.pdf
